# Supplementary material
Source: publisher figshare collection journal article supplement (https://acs.figshare.com/ndownloader/files/5115661)
Supplement: Supplementary file 1 [file 5115661]

data_global

_journal_coden_Cambridge         9
_journal_volume                  ?
_journal_year                    ?
_journal_page_first              ?

_publ_requested_journal          'Inorganic Chemistry'

loop_
_publ_author_name
'Dongfeng Li'
'Sean Parkin'
'Guangbin Wang'
'Gordon T. Yee'
'Stephen M. Holmes'

_publ_contact_author_name        'Stephen M. Holmes'

_publ_section_title              
;Single Molecule Magnets Constructed from Cyanometalates:
[Tp*FeIII(CN)3MII(DMF)4]2[OTf]2.2DMF (MII = Co, Ni)
;

#((Tp*FeIII(CN)3-MII(DMF)4)2-(OTf)2.2DMF

data_k04010
_database_code_depnum_ccdc_archive 'CCDC 256539'

_audit_creation_method           SHELXL-97
_chemical_name_systematic        
;
?
;
_chemical_name_common            ?
_chemical_melting_point          ?
_chemical_formula_moiety         ((Tp*FeIII(CN)3-MII(DMF)4)2-(OTf)2.2DMF
_chemical_formula_sum            'C68 H114 B2 F6 Fe2 Mn2 N28 O16 S2'
_chemical_formula_weight         2001.19

loop_
_atom_type_symbol
_atom_type_description
_atom_type_scat_dispersion_real
_atom_type_scat_dispersion_imag
_atom_type_scat_source
C C 0.0033 0.0016 'International Tables Vol C Tables 4.2.6.8 and 6.1.1.4'
H H 0.0000 0.0000 'International Tables Vol C Tables 4.2.6.8 and 6.1.1.4'
N N 0.0061 0.0033 'International Tables Vol C Tables 4.2.6.8 and 6.1.1.4'
Fe Fe 0.3463 0.8444 'International Tables Vol C Tables 4.2.6.8 and 6.1.1.4'
Mn Mn 0.3368 0.7283 'International Tables Vol C Tables 4.2.6.8 and 6.1.1.4'
S S 0.1246 0.1234 'International Tables Vol C Tables 4.2.6.8 and 6.1.1.4'
B B 0.0013 0.0007 'International Tables Vol C Tables 4.2.6.8 and 6.1.1.4'
F F 0.0171 0.0103 'International Tables Vol C Tables 4.2.6.8 and 6.1.1.4'
O O 0.0106 0.0060 'International Tables Vol C Tables 4.2.6.8 and 6.1.1.4'

_symmetry_cell_setting           monoclinic
_symmetry_space_group_name_H-M   'P 21/m'

loop_
_symmetry_equiv_pos_as_xyz
'x, y, z'
'-x+1/2, y+1/2, -z+1/2'
'-x, -y, -z'
'x-1/2, -y-1/2, z-1/2'

_cell_length_a                   15.295(3)
_cell_length_b                   13.194(3)
_cell_length_c                   24.321(5)
_cell_angle_alpha                90.00
_cell_angle_beta                 107.09(3)
_cell_angle_gamma                90.00
_cell_volume                     4691.3(16)
_cell_formula_units_Z            2
_cell_measurement_temperature    90(2)
_cell_measurement_reflns_used    25457
_cell_measurement_theta_min      1.00
_cell_measurement_theta_max      30.03

_exptl_crystal_description       block
_exptl_crystal_colour            red
_exptl_crystal_size_max          0.20
_exptl_crystal_size_mid          0.20
_exptl_crystal_size_min          0.10
_exptl_crystal_density_meas      ?
_exptl_crystal_density_diffrn    1.417
_exptl_crystal_density_method    'not measured'
_exptl_crystal_F_000             2088
_exptl_absorpt_coefficient_mu    0.696
_exptl_absorpt_correction_type   multi-scan
_exptl_absorpt_correction_T_min  0.8733
_exptl_absorpt_correction_T_max  0.9336
_exptl_absorpt_process_details   'Scalepack (Otwinowski & Minor, 1997)'

_exptl_special_details           
;
?
;

#_diffrn_ambient_temperature       90(2)
_diffrn_ambient_temperature      90.0(2)
_diffrn_radiation_wavelength     0.71073
_diffrn_radiation_type           MoK\a
_diffrn_radiation_source         'fine-focus sealed tube'
_diffrn_radiation_monochromator  graphite
_diffrn_measurement_device_type  'Nonius KappaCCD diffractometer'
_diffrn_measurement_method       '\w scans at fixed \c == 55\%'
_diffrn_detector_area_resol_mean 18
_diffrn_standards_number         ?
_diffrn_standards_interval_count ?
_diffrn_standards_interval_time  ?
_diffrn_standards_decay_%        ?
_diffrn_reflns_number            31439
_diffrn_reflns_av_R_equivalents  0.0868
_diffrn_reflns_av_sigmaI/netI    0.0705
_diffrn_reflns_limit_h_min       -18
_diffrn_reflns_limit_h_max       18
_diffrn_reflns_limit_k_min       -15
_diffrn_reflns_limit_k_max       15
_diffrn_reflns_limit_l_min       -28
_diffrn_reflns_limit_l_max       28
_diffrn_reflns_theta_min         1.41
_diffrn_reflns_theta_max         25.00
_reflns_number_total             8252
_reflns_number_gt                5393
_reflns_threshold_expression     >2sigma(I)

_computing_data_collection       'COLLECT (Nonius, 1998)'
_computing_cell_refinement       'SCALEPACK (Otwinowski & Minor, 1997)'
_computing_data_reduction        'DENZO-SMN (Otwinowski & Minor, 1997)'
_computing_structure_solution    'SHELXS-97 (Sheldrick, 1990)'
_computing_structure_refinement  'SHELXL-97 (Sheldrick, 1997)'
_computing_molecular_graphics    'XP in SHELXTL (Sheldrick, 1995)'
_computing_publication_material  
;
SHELX97-2 (Sheldrick, 1997) and local procedures
;

_refine_special_details          
;
Refinement of F^2^ against ALL reflections.  The weighted R-factor wR and
goodness of fit S are based on F^2^, conventional R-factors R are based
on F, with F set to zero for negative F^2^. The threshold expression of
F^2^ > 2sigma(F^2^) is used only for calculating R-factors(gt) etc. and is
not relevant to the choice of reflections for refinement.  R-factors based
on F^2^ are statistically about twice as large as those based on F, and R-
factors based on ALL data will be even larger.
;

_refine_ls_structure_factor_coef Fsqd
_refine_ls_matrix_type           full
_refine_ls_weighting_scheme      calc
_refine_ls_weighting_details     
'calc w==1/[\s^2^(Fo^2^)+(0.1178P)^2^+0.0000P] where P==(Fo^2^+2Fc^2^)/3'
_atom_sites_solution_primary     direct
_atom_sites_solution_secondary   difmap
_atom_sites_solution_hydrogens   geom
_refine_ls_hydrogen_treatment    mixed
_refine_ls_extinction_method     none
_refine_ls_extinction_coef       ?
_refine_ls_number_reflns         8252
_refine_ls_number_parameters     624
_refine_ls_number_restraints     0
_refine_ls_R_factor_all          0.1087
_refine_ls_R_factor_gt           0.0655
_refine_ls_wR_factor_ref         0.1997
_refine_ls_wR_factor_gt          0.1801
_refine_ls_goodness_of_fit_ref   1.088
_refine_ls_restrained_S_all      1.088
_refine_ls_shift/su_max          0.001
_refine_ls_shift/su_mean         0.000

loop_
_atom_site_label
_atom_site_type_symbol
_atom_site_fract_x
_atom_site_fract_y
_atom_site_fract_z
_atom_site_U_iso_or_equiv
_atom_site_adp_type
_atom_site_occupancy
_atom_site_symmetry_multiplicity
_atom_site_calc_flag
_atom_site_refinement_flags
_atom_site_disorder_assembly
_atom_site_disorder_group
Fe1 Fe 1.11906(4) 0.77676(5) 0.59605(3) 0.0199(2) Uani 1 1 d . . .
Mn1 Mn 0.78366(5) 0.90709(5) 0.50366(3) 0.0218(2) Uani 1 1 d . . .
B1 B 1.1886(4) 0.5581(4) 0.6115(2) 0.0243(13) Uani 1 1 d . . .
H1 H 1.2117 0.4867 0.6161 0.029 Uiso 1 1 calc R . .
C1 C 1.3407(4) 0.8969(4) 0.6562(2) 0.0329(13) Uani 1 1 d . . .
H1A H 1.2803 0.9289 0.6432 0.049 Uiso 1 1 calc R . .
H1B H 1.3781 0.9201 0.6321 0.049 Uiso 1 1 calc R . .
H1C H 1.3707 0.9155 0.6963 0.049 Uiso 1 1 calc R . .
C2 C 1.3301(3) 0.7840(3) 0.6514(2) 0.0251(11) Uani 1 1 d . . .
C3 C 1.3997(3) 0.7132(4) 0.6667(2) 0.0304(12) Uani 1 1 d . . .
H3A H 1.4631 0.7265 0.6832 0.036 Uiso 1 1 calc R . .
C4 C 1.3594(3) 0.6201(4) 0.6534(2) 0.0312(12) Uani 1 1 d . . .
C5 C 1.4007(4) 0.5140(4) 0.6611(3) 0.0450(15) Uani 1 1 d . . .
H5A H 1.3520 0.4638 0.6474 0.067 Uiso 1 1 calc R . .
H5B H 1.4320 0.5022 0.7020 0.067 Uiso 1 1 calc R . .
H5C H 1.4446 0.5080 0.6390 0.067 Uiso 1 1 calc R . .
C6 C 1.0351(4) 0.7707(4) 0.4411(2) 0.0369(13) Uani 1 1 d . . .
H6A H 1.0396 0.8278 0.4675 0.055 Uiso 1 1 calc R . .
H6B H 0.9708 0.7589 0.4199 0.055 Uiso 1 1 calc R . .
H6C H 1.0695 0.7862 0.4139 0.055 Uiso 1 1 calc R . .
C7 C 1.0735(3) 0.6789(4) 0.47423(19) 0.0278(11) Uani 1 1 d . . .
C8 C 1.0799(4) 0.5825(4) 0.4540(2) 0.0359(13) Uani 1 1 d . . .
H8A H 1.0599 0.5616 0.4149 0.043 Uiso 1 1 calc R . .
C9 C 1.1207(3) 0.5217(4) 0.5008(2) 0.0299(12) Uani 1 1 d . . .
C10 C 1.1401(4) 0.4112(4) 0.5049(3) 0.0472(15) Uani 1 1 d . . .
H10A H 1.1704 0.3930 0.5450 0.071 Uiso 1 1 calc R . .
H10B H 1.1800 0.3941 0.4813 0.071 Uiso 1 1 calc R . .
H10C H 1.0825 0.3736 0.4910 0.071 Uiso 1 1 calc R . .
C11 C 0.9553(4) 0.7474(4) 0.6778(2) 0.0378(14) Uani 1 1 d . . .
H11A H 0.9661 0.8069 0.6566 0.057 Uiso 1 1 calc R . .
H11B H 0.9684 0.7645 0.7186 0.057 Uiso 1 1 calc R . .
H11C H 0.8913 0.7263 0.6625 0.057 Uiso 1 1 calc R . .
C12 C 1.0164(3) 0.6627(4) 0.6711(2) 0.0255(11) Uani 1 1 d . . .
C13 C 1.0203(3) 0.5657(4) 0.6947(2) 0.0282(12) Uani 1 1 d . . .
H13A H 0.9854 0.5413 0.7185 0.034 Uiso 1 1 calc R . .
C14 C 1.0847(3) 0.5122(3) 0.67703(19) 0.0255(11) Uani 1 1 d . . .
C15 C 1.1171(4) 0.4054(4) 0.6904(2) 0.0335(13) Uani 1 1 d . . .
H15A H 1.1640 0.3901 0.6715 0.050 Uiso 1 1 calc R . .
H15B H 1.0655 0.3588 0.6764 0.050 Uiso 1 1 calc R . .
H15C H 1.1431 0.3975 0.7321 0.050 Uiso 1 1 calc R . .
C16 C 1.1536(3) 0.8870(4) 0.55572(19) 0.0231(11) Uani 1 1 d . . .
C17 C 1.1264(3) 0.8718(4) 0.6580(2) 0.0273(11) Uani 1 1 d . . .
C18 C 0.9964(4) 0.8221(3) 0.56048(19) 0.0230(11) Uani 1 1 d . . .
C19 C 0.5874(4) 0.8832(5) 0.4337(2) 0.0507(16) Uani 1 1 d . . .
H19A H 0.6109 0.8173 0.4310 0.061 Uiso 1 1 calc R . .
C20 C 0.4621(6) 1.0019(5) 0.4042(3) 0.078(2) Uani 1 1 d . . .
H20A H 0.5049 1.0445 0.4328 0.118 Uiso 1 1 calc R . .
H20B H 0.4065 0.9913 0.4156 0.118 Uiso 1 1 calc R . .
H20C H 0.4464 1.0355 0.3666 0.118 Uiso 1 1 calc R . .
C21 C 0.4512(5) 0.8269(6) 0.3595(3) 0.079(2) Uani 1 1 d . . .
H21A H 0.4883 0.7656 0.3618 0.119 Uiso 1 1 calc R . .
H21B H 0.4349 0.8540 0.3203 0.119 Uiso 1 1 calc R . .
H21C H 0.3954 0.8103 0.3695 0.119 Uiso 1 1 calc R . .
C22 C 0.6988(4) 0.7609(4) 0.5733(2) 0.0404(14) Uani 1 1 d . A .
H22A H 0.6769 0.8223 0.5849 0.049 Uiso 0.564(18) 1 calc PR A 1
H22B H 0.6781 0.8224 0.5855 0.049 Uiso 0.436(18) 1 d PR A 2
C23A C 0.6065(15) 0.6889(18) 0.6261(9) 0.089(8) Uani 0.564(18) 1 d P A 1
H23A H 0.6154 0.7492 0.6506 0.133 Uiso 0.564(18) 1 calc PR A 1
H23B H 0.6077 0.6282 0.6496 0.133 Uiso 0.564(18) 1 calc PR A 1
H23C H 0.5473 0.6933 0.5964 0.133 Uiso 0.564(18) 1 calc PR A 1
C24A C 0.7419(10) 0.5994(10) 0.6088(8) 0.085(6) Uani 0.564(18) 1 d P A 1
H24A H 0.7897 0.6095 0.6453 0.127 Uiso 0.564(18) 1 calc PR A 1
H24B H 0.7701 0.5940 0.5775 0.127 Uiso 0.564(18) 1 calc PR A 1
H24C H 0.7083 0.5369 0.6107 0.127 Uiso 0.564(18) 1 calc PR A 1
C23B C 0.6587(18) 0.665(2) 0.6489(9) 0.073(8) Uani 0.436(18) 1 d P A 2
H23D H 0.6670 0.7271 0.6718 0.109 Uiso 0.436(18) 1 calc PR A 2
H23E H 0.6985 0.6115 0.6710 0.109 Uiso 0.436(18) 1 calc PR A 2
H23F H 0.5947 0.6428 0.6396 0.109 Uiso 0.436(18) 1 calc PR A 2
C24B C 0.655(2) 0.5865(16) 0.5537(12) 0.122(12) Uani 0.436(18) 1 d P A 2
H24D H 0.6998 0.5814 0.5323 0.183 Uiso 0.436(18) 1 calc PR A 2
H24E H 0.5938 0.5968 0.5268 0.183 Uiso 0.436(18) 1 calc PR A 2
H24F H 0.6554 0.5239 0.5755 0.183 Uiso 0.436(18) 1 calc PR A 2
C25 C 0.8648(3) 1.0154(4) 0.6192(2) 0.0262(11) Uani 1 1 d . A .
H25A H 0.9205 0.9846 0.6182 0.031 Uiso 1 1 calc R . .
C26 C 0.7863(4) 1.1326(5) 0.6634(3) 0.0504(16) Uani 1 1 d . . .
H26A H 0.7339 1.1086 0.6323 0.076 Uiso 1 1 calc R . .
H26B H 0.7923 1.2061 0.6602 0.076 Uiso 1 1 calc R . .
H26C H 0.7768 1.1164 0.7006 0.076 Uiso 1 1 calc R . .
C27 C 0.9540(4) 1.1095(5) 0.7022(2) 0.0454(15) Uani 1 1 d . . .
H27A H 1.0047 1.0720 0.6947 0.068 Uiso 1 1 calc R . .
H27B H 0.9498 1.0921 0.7405 0.068 Uiso 1 1 calc R . .
H27C H 0.9649 1.1825 0.7004 0.068 Uiso 1 1 calc R . .
C28 C 0.7850(3) 0.8521(4) 0.3774(2) 0.0304(12) Uani 1 1 d . A .
H28A H 0.8307 0.9023 0.3805 0.037 Uiso 1 1 calc R . .
C29 C 0.7701(4) 0.8441(4) 0.2752(2) 0.0351(13) Uani 1 1 d . . .
H29A H 0.8204 0.8932 0.2860 0.053 Uiso 1 1 calc R . .
H29B H 0.7168 0.8755 0.2478 0.053 Uiso 1 1 calc R . .
H29C H 0.7893 0.7849 0.2573 0.053 Uiso 1 1 calc R . .
C30 C 0.6741(4) 0.7397(4) 0.3177(2) 0.0425(15) Uani 1 1 d . . .
H30A H 0.6637 0.7241 0.3547 0.064 Uiso 1 1 calc R . .
H30B H 0.6912 0.6775 0.3013 0.064 Uiso 1 1 calc R . .
H30C H 0.6180 0.7675 0.2913 0.064 Uiso 1 1 calc R . .
N1 N 1.2490(3) 0.7353(3) 0.63121(16) 0.0222(9) Uani 1 1 d . . .
N2 N 1.2677(2) 0.6330(3) 0.63301(16) 0.0222(9) Uani 1 1 d . . .
N3 N 1.1099(3) 0.6792(3) 0.53315(16) 0.0225(9) Uani 1 1 d . . .
N4 N 1.1402(3) 0.5815(3) 0.54793(16) 0.0239(9) Uani 1 1 d . . .
N5 N 1.0774(3) 0.6682(3) 0.64080(16) 0.0223(9) Uani 1 1 d . . .
N6 N 1.1194(2) 0.5750(3) 0.64513(15) 0.0202(9) Uani 1 1 d . . .
N7 N 1.1735(3) 0.9561(3) 0.53285(16) 0.0268(9) Uani 1 1 d . . .
N8 N 1.1287(3) 0.9271(3) 0.69510(18) 0.0336(11) Uani 1 1 d . . .
N9 N 0.9229(3) 0.8513(3) 0.53943(16) 0.0243(9) Uani 1 1 d . . .
N10 N 0.5047(3) 0.9044(4) 0.4005(2) 0.0578(15) Uani 1 1 d . . .
N11 N 0.6809(4) 0.6827(4) 0.5983(2) 0.0490(13) Uani 1 1 d . . .
N12 N 0.8695(3) 1.0830(3) 0.65934(16) 0.0259(9) Uani 1 1 d . . .
N13 N 0.7463(3) 0.8125(3) 0.32621(16) 0.0276(10) Uani 1 1 d . . .
O1 O 0.6381(3) 0.9452(3) 0.46919(16) 0.0476(10) Uani 1 1 d . . .
O2 O 0.7373(3) 0.7719(3) 0.53834(17) 0.0466(10) Uani 1 1 d . . .
O3 O 0.7948(2) 0.9883(2) 0.58267(13) 0.0268(8) Uani 1 1 d . . .
O4 O 0.7654(2) 0.8281(3) 0.42170(14) 0.0340(9) Uani 1 1 d . . .
S1 S 0.32875(10) 0.08976(11) 0.23195(6) 0.0375(4) Uani 1 1 d . . .
O5 O 0.3954(3) 0.1556(3) 0.2654(2) 0.0623(12) Uani 1 1 d . . .
O6 O 0.3054(4) 0.1095(3) 0.17154(17) 0.0650(13) Uani 1 1 d . . .
O7 O 0.3403(3) -0.0158(3) 0.24792(18) 0.0517(11) Uani 1 1 d . . .
C31 C 0.2241(4) 0.1223(4) 0.2488(3) 0.0432(15) Uani 1 1 d . . .
F1 F 0.2346(3) 0.1087(3) 0.30523(18) 0.0716(12) Uani 1 1 d . . .
F2 F 0.2010(3) 0.2182(2) 0.23700(18) 0.0653(11) Uani 1 1 d . . .
F3 F 0.1547(3) 0.0660(3) 0.2206(2) 0.0848(14) Uani 1 1 d . . .
N1S N 0.3758(7) 0.7029(8) 0.4781(4) 0.109(3) Uani 1 1 d . . .
O1SA O 0.5151(14) 0.6749(17) 0.4615(12) 0.228(11) Uani 0.586(16) 1 d P B 1
C1SA C 0.452(3) 0.650(3) 0.4786(16) 0.129(9) Uani 0.586(16) 1 d P B 1
H1SA H 0.4569 0.5846 0.4950 0.155 Uiso 0.586(16) 1 calc PR B 1
C2SA C 0.4293(16) 0.7911(14) 0.5107(6) 0.136(10) Uani 0.586(16) 1 d P B 1
H2SA H 0.4934 0.7853 0.5112 0.203 Uiso 0.586(16) 1 calc PR B 1
H2SB H 0.4255 0.7907 0.5502 0.203 Uiso 0.586(16) 1 calc PR B 1
H2SC H 0.4037 0.8546 0.4918 0.203 Uiso 0.586(16) 1 calc PR B 1
C3SA C 0.2773(13) 0.7016(19) 0.4654(9) 0.112(7) Uani 0.586(16) 1 d P B 1
H3SA H 0.2531 0.6385 0.4455 0.168 Uiso 0.586(16) 1 calc PR B 1
H3SB H 0.2512 0.7595 0.4408 0.168 Uiso 0.586(16) 1 calc PR B 1
H3SC H 0.2609 0.7059 0.5014 0.168 Uiso 0.586(16) 1 calc PR B 1
O1SB O 0.447(3) 0.586(3) 0.4398(19) 0.221(16) Uani 0.414(16) 1 d P B 2
C1SB C 0.407(3) 0.666(3) 0.434(2) 0.126(12) Uani 0.414(16) 1 d P B 2
H1SB H 0.3967 0.7035 0.3993 0.151 Uiso 0.414(16) 1 calc PR B 2
C2SB C 0.314(2) 0.772(2) 0.4970(13) 0.124(12) Uani 0.414(16) 1 d P B 2
H2SD H 0.2516 0.7433 0.4856 0.186 Uiso 0.414(16) 1 calc PR B 2
H2SE H 0.3128 0.8382 0.4789 0.186 Uiso 0.414(16) 1 calc PR B 2
H2SF H 0.3351 0.7792 0.5389 0.186 Uiso 0.414(16) 1 calc PR B 2
C3SB C 0.340(3) 0.616(3) 0.5034(17) 0.166(15) Uani 0.414(16) 1 d P B 2
H3SD H 0.3110 0.5677 0.4731 0.248 Uiso 0.414(16) 1 calc PR B 2
H3SE H 0.2953 0.6405 0.5220 0.248 Uiso 0.414(16) 1 calc PR B 2
H3SF H 0.3908 0.5829 0.5321 0.248 Uiso 0.414(16) 1 calc PR B 2

loop_
_atom_site_aniso_label
_atom_site_aniso_U_11
_atom_site_aniso_U_22
_atom_site_aniso_U_33
_atom_site_aniso_U_23
_atom_site_aniso_U_13
_atom_site_aniso_U_12
Fe1 0.0223(4) 0.0172(4) 0.0175(4) 0.0016(3) 0.0014(3) -0.0004(3)
Mn1 0.0213(4) 0.0220(4) 0.0190(4) 0.0030(3) 0.0011(3) -0.0034(3)
B1 0.022(3) 0.014(3) 0.033(3) 0.000(2) 0.002(2) -0.002(2)
C1 0.033(3) 0.026(3) 0.032(3) 0.003(2) -0.002(2) -0.009(2)
C2 0.025(3) 0.020(3) 0.026(3) 0.002(2) 0.001(2) -0.006(2)
C3 0.021(3) 0.035(3) 0.030(3) 0.009(2) 0.000(2) -0.005(2)
C4 0.027(3) 0.025(3) 0.036(3) 0.008(2) 0.000(2) -0.002(2)
C5 0.026(3) 0.028(3) 0.071(4) 0.004(3) 0.000(3) 0.006(2)
C6 0.050(4) 0.035(3) 0.018(3) 0.000(2) -0.001(2) -0.003(3)
C7 0.025(3) 0.035(3) 0.018(2) 0.000(2) -0.001(2) -0.001(2)
C8 0.043(3) 0.037(3) 0.022(3) -0.014(2) 0.001(2) 0.000(3)
C9 0.027(3) 0.029(3) 0.032(3) -0.011(2) 0.006(2) -0.002(2)
C10 0.057(4) 0.030(3) 0.052(4) -0.014(3) 0.012(3) 0.003(3)
C11 0.033(3) 0.046(3) 0.037(3) 0.012(3) 0.014(3) 0.010(3)
C12 0.019(3) 0.032(3) 0.025(3) 0.001(2) 0.006(2) -0.004(2)
C13 0.024(3) 0.037(3) 0.023(3) 0.004(2) 0.005(2) -0.007(2)
C14 0.028(3) 0.022(3) 0.022(3) 0.005(2) 0.000(2) -0.009(2)
C15 0.047(3) 0.021(3) 0.027(3) 0.002(2) 0.003(2) -0.008(2)
C16 0.029(3) 0.023(3) 0.014(2) 0.001(2) 0.001(2) 0.001(2)
C17 0.021(3) 0.027(3) 0.031(3) 0.010(2) 0.003(2) 0.002(2)
C18 0.036(3) 0.013(2) 0.020(2) -0.001(2) 0.008(2) -0.003(2)
C19 0.036(4) 0.071(5) 0.041(4) -0.001(3) 0.003(3) -0.008(3)
C20 0.109(7) 0.049(4) 0.078(5) 0.012(4) 0.029(5) 0.038(4)
C21 0.048(4) 0.085(6) 0.097(6) -0.030(5) 0.010(4) -0.008(4)
C22 0.057(4) 0.028(3) 0.044(3) -0.013(3) 0.027(3) -0.008(3)
C23A 0.108(17) 0.104(16) 0.080(15) -0.041(13) 0.066(12) -0.059(15)
C24A 0.062(10) 0.056(9) 0.142(16) 0.062(9) 0.039(10) 0.008(7)
C23B 0.09(2) 0.079(15) 0.043(12) 0.004(10) 0.018(11) -0.057(15)
C24B 0.17(3) 0.076(16) 0.15(3) 0.011(15) 0.09(2) -0.010(16)
C25 0.032(3) 0.023(3) 0.026(3) -0.003(2) 0.013(2) 0.000(2)
C26 0.040(4) 0.047(4) 0.066(4) -0.022(3) 0.018(3) -0.002(3)
C27 0.041(4) 0.054(4) 0.038(3) -0.018(3) 0.007(3) 0.000(3)
C28 0.032(3) 0.025(3) 0.030(3) -0.001(2) 0.002(2) 0.002(2)
C29 0.046(3) 0.030(3) 0.026(3) 0.001(2) 0.004(2) 0.006(2)
C30 0.056(4) 0.041(3) 0.028(3) -0.008(3) 0.009(3) -0.016(3)
N1 0.021(2) 0.018(2) 0.025(2) 0.0038(17) 0.0032(17) -0.0002(17)
N2 0.017(2) 0.018(2) 0.030(2) 0.0039(17) 0.0034(17) -0.0020(16)
N3 0.025(2) 0.017(2) 0.025(2) -0.0013(17) 0.0067(17) -0.0013(17)
N4 0.024(2) 0.016(2) 0.029(2) 0.0032(17) 0.0044(18) 0.0016(16)
N5 0.021(2) 0.019(2) 0.023(2) 0.0049(17) 0.0017(17) 0.0012(17)
N6 0.022(2) 0.016(2) 0.019(2) 0.0028(16) 0.0002(16) -0.0021(16)
N7 0.031(2) 0.023(2) 0.023(2) 0.0063(19) 0.0030(18) -0.0014(19)
N8 0.043(3) 0.027(2) 0.028(2) -0.008(2) 0.007(2) -0.001(2)
N9 0.027(2) 0.022(2) 0.020(2) 0.0000(17) -0.0003(18) 0.0053(18)
N10 0.040(3) 0.063(4) 0.060(4) -0.010(3) -0.001(3) 0.003(3)
N11 0.061(3) 0.036(3) 0.061(3) 0.011(3) 0.035(3) -0.008(3)
N12 0.030(2) 0.025(2) 0.026(2) -0.0012(18) 0.0138(18) 0.0019(18)
N13 0.035(3) 0.021(2) 0.021(2) -0.0004(17) -0.0005(18) -0.0011(18)
O1 0.034(2) 0.061(3) 0.044(2) 0.000(2) 0.0062(19) 0.001(2)
O2 0.068(3) 0.033(2) 0.047(2) -0.0013(19) 0.030(2) -0.015(2)
O3 0.0249(19) 0.0268(19) 0.0268(18) -0.0016(15) 0.0048(15) 0.0000(15)
O4 0.045(2) 0.032(2) 0.0199(18) -0.0019(16) 0.0023(16) -0.0131(17)
S1 0.0400(8) 0.0368(8) 0.0434(9) 0.0083(7) 0.0239(7) 0.0103(7)
O5 0.045(3) 0.060(3) 0.078(3) 0.005(3) 0.013(2) -0.012(2)
O6 0.111(4) 0.055(3) 0.041(3) 0.007(2) 0.043(3) 0.014(3)
O7 0.068(3) 0.036(2) 0.067(3) 0.011(2) 0.044(2) 0.019(2)
C31 0.041(4) 0.031(3) 0.067(4) 0.014(3) 0.031(3) 0.005(3)
F1 0.114(3) 0.044(2) 0.091(3) 0.021(2) 0.084(3) 0.018(2)
F2 0.069(3) 0.040(2) 0.111(3) 0.032(2) 0.064(2) 0.0261(18)
F3 0.040(2) 0.071(3) 0.139(4) 0.022(3) 0.020(2) -0.012(2)
N1S 0.094(7) 0.130(8) 0.097(6) -0.030(6) 0.021(5) 0.002(6)
O1SA 0.135(17) 0.21(2) 0.36(3) -0.02(2) 0.105(19) -0.043(14)
C1SA 0.11(2) 0.13(2) 0.17(3) -0.02(2) 0.08(2) -0.003(18)
C2SA 0.22(3) 0.134(17) 0.049(9) -0.033(10) 0.037(12) -0.063(16)
C3SA 0.096(15) 0.133(19) 0.109(15) -0.020(13) 0.032(11) -0.002(13)
O1SB 0.19(3) 0.21(3) 0.27(4) -0.08(3) 0.07(3) 0.01(3)
C1SB 0.09(2) 0.15(4) 0.15(4) -0.03(3) 0.05(3) 0.01(2)
C2SB 0.11(3) 0.14(3) 0.14(3) 0.01(2) 0.07(2) 0.03(2)
C3SB 0.16(3) 0.14(3) 0.21(4) -0.03(3) 0.08(3) -0.01(3)

_geom_special_details            
;
All esds (except the esd in the dihedral angle between two l.s. planes)
are estimated using the full covariance matrix.  The cell esds are taken
into account individually in the estimation of esds in distances, angles
and torsion angles; correlations between esds in cell parameters are only
used when they are defined by crystal symmetry.  An approximate (isotropic)
treatment of cell esds is used for estimating esds involving l.s. planes.
;

loop_
_geom_bond_atom_site_label_1
_geom_bond_atom_site_label_2
_geom_bond_distance
_geom_bond_site_symmetry_2
_geom_bond_publ_flag
Fe1 C16 1.914(5) . ?
Fe1 C18 1.916(5) . ?
Fe1 C17 1.938(6) . ?
Fe1 N3 1.973(4) . ?
Fe1 N1 1.995(4) . ?
Fe1 N5 2.012(4) . ?
Mn1 O3 2.163(3) . ?
Mn1 N9 2.178(4) . ?
Mn1 O2 2.179(4) . ?
Mn1 O4 2.193(3) . ?
Mn1 O1 2.195(4) . ?
Mn1 N7 2.195(4) 3_776 ?
B1 N2 1.530(6) . ?
B1 N6 1.534(7) . ?
B1 N4 1.536(7) . ?
C1 C2 1.499(6) . ?
C2 N1 1.355(6) . ?
C2 C3 1.383(7) . ?
C3 C4 1.370(7) . ?
C4 N2 1.354(6) . ?
C4 C5 1.524(7) . ?
C6 C7 1.477(7) . ?
C7 N3 1.376(6) . ?
C7 C8 1.377(7) . ?
C8 C9 1.384(7) . ?
C9 N4 1.351(6) . ?
C9 C10 1.485(7) . ?
C11 C12 1.497(7) . ?
C12 N5 1.350(6) . ?
C12 C13 1.397(7) . ?
C13 C14 1.379(7) . ?
C14 N6 1.346(6) . ?
C14 C15 1.498(7) . ?
C16 N7 1.154(6) . ?
C17 N8 1.153(6) . ?
C18 N9 1.157(6) . ?
C19 O1 1.274(7) . ?
C19 N10 1.315(7) . ?
C20 N10 1.457(8) . ?
C21 N10 1.492(8) . ?
C22 O2 1.176(6) . ?
C22 N11 1.269(7) . ?
C23A N11 1.487(19) . ?
C24A N11 1.416(13) . ?
C23B N11 1.39(2) . ?
C24B N11 1.64(2) . ?
C25 O3 1.226(5) . ?
C25 N12 1.310(6) . ?
C26 N12 1.460(7) . ?
C27 N12 1.445(6) . ?
C28 O4 1.242(6) . ?
C28 N13 1.318(6) . ?
C29 N13 1.454(6) . ?
C30 N13 1.432(6) . ?
N1 N2 1.378(5) . ?
N3 N4 1.381(5) . ?
N5 N6 1.376(5) . ?
N7 Mn1 2.195(4) 3_776 ?
S1 O5 1.403(4) . ?
S1 O6 1.430(4) . ?
S1 O7 1.442(4) . ?
S1 C31 1.817(6) . ?
C31 F3 1.311(7) . ?
C31 F2 1.323(6) . ?
C31 F1 1.346(7) . ?
N1S C1SA 1.36(3) . ?
N1S C1SB 1.38(5) . ?
N1S C3SA 1.45(2) . ?
N1S C3SB 1.48(3) . ?
N1S C2SB 1.48(3) . ?
N1S C2SA 1.507(17) . ?
O1SA C1SA 1.20(3) . ?
O1SB C1SB 1.21(5) . ?

loop_
_geom_angle_atom_site_label_1
_geom_angle_atom_site_label_2
_geom_angle_atom_site_label_3
_geom_angle
_geom_angle_site_symmetry_1
_geom_angle_site_symmetry_3
_geom_angle_publ_flag
C16 Fe1 C18 85.0(2) . . ?
C16 Fe1 C17 86.8(2) . . ?
C18 Fe1 C17 88.54(19) . . ?
C16 Fe1 N3 93.80(17) . . ?
C18 Fe1 N3 90.95(17) . . ?
C17 Fe1 N3 179.14(18) . . ?
C16 Fe1 N1 92.17(18) . . ?
C18 Fe1 N1 177.14(18) . . ?
C17 Fe1 N1 91.20(18) . . ?
N3 Fe1 N1 89.35(16) . . ?
C16 Fe1 N5 175.76(18) . . ?
C18 Fe1 N5 92.46(17) . . ?
C17 Fe1 N5 89.73(18) . . ?
N3 Fe1 N5 89.61(16) . . ?
N1 Fe1 N5 90.39(15) . . ?
O3 Mn1 N9 90.00(13) . . ?
O3 Mn1 O2 90.64(14) . . ?
N9 Mn1 O2 87.71(16) . . ?
O3 Mn1 O4 177.06(13) . . ?
N9 Mn1 O4 92.93(14) . . ?
O2 Mn1 O4 89.64(14) . . ?
O3 Mn1 O1 91.82(14) . . ?
N9 Mn1 O1 173.27(15) . . ?
O2 Mn1 O1 85.80(16) . . ?
O4 Mn1 O1 85.28(15) . . ?
O3 Mn1 N7 89.83(14) . 3_776 ?
N9 Mn1 N7 93.81(15) . 3_776 ?
O2 Mn1 N7 178.41(16) . 3_776 ?
O4 Mn1 N7 89.81(14) . 3_776 ?
O1 Mn1 N7 92.67(15) . 3_776 ?
N2 B1 N6 108.8(4) . . ?
N2 B1 N4 108.2(4) . . ?
N6 B1 N4 107.7(4) . . ?
N1 C2 C3 109.2(4) . . ?
N1 C2 C1 124.5(4) . . ?
C3 C2 C1 126.4(4) . . ?
C4 C3 C2 106.5(4) . . ?
N2 C4 C3 108.6(4) . . ?
N2 C4 C5 120.6(4) . . ?
C3 C4 C5 130.8(5) . . ?
N3 C7 C8 109.0(4) . . ?
N3 C7 C6 122.7(4) . . ?
C8 C7 C6 128.3(4) . . ?
C7 C8 C9 107.6(4) . . ?
N4 C9 C8 107.0(4) . . ?
N4 C9 C10 121.8(5) . . ?
C8 C9 C10 131.1(5) . . ?
N5 C12 C13 108.8(4) . . ?
N5 C12 C11 125.0(4) . . ?
C13 C12 C11 126.3(4) . . ?
C14 C13 C12 106.7(4) . . ?
N6 C14 C13 107.7(4) . . ?
N6 C14 C15 122.9(5) . . ?
C13 C14 C15 129.4(5) . . ?
N7 C16 Fe1 177.4(4) . . ?
N8 C17 Fe1 178.1(4) . . ?
N9 C18 Fe1 178.6(4) . . ?
O1 C19 N10 124.3(6) . . ?
O2 C22 N11 132.2(6) . . ?
O3 C25 N12 125.6(5) . . ?
O4 C28 N13 124.2(5) . . ?
C2 N1 N2 107.0(4) . . ?
C2 N1 Fe1 135.8(3) . . ?
N2 N1 Fe1 117.0(3) . . ?
C4 N2 N1 108.6(4) . . ?
C4 N2 B1 132.3(4) . . ?
N1 N2 B1 119.1(4) . . ?
C7 N3 N4 105.7(4) . . ?
C7 N3 Fe1 136.4(3) . . ?
N4 N3 Fe1 117.7(3) . . ?
C9 N4 N3 110.6(4) . . ?
C9 N4 B1 131.0(4) . . ?
N3 N4 B1 118.4(4) . . ?
C12 N5 N6 106.9(4) . . ?
C12 N5 Fe1 135.5(3) . . ?
N6 N5 Fe1 117.6(3) . . ?
C14 N6 N5 109.9(4) . . ?
C14 N6 B1 132.0(4) . . ?
N5 N6 B1 118.0(4) . . ?
C16 N7 Mn1 175.3(4) . 3_776 ?
C18 N9 Mn1 177.4(4) . . ?
C19 N10 C20 121.1(6) . . ?
C19 N10 C21 120.2(6) . . ?
C20 N10 C21 118.6(6) . . ?
C22 N11 C23B 135.0(12) . . ?
C22 N11 C24A 119.6(7) . . ?
C23B N11 C24A 91.6(14) . . ?
C22 N11 C23A 118.4(11) . . ?
C23B N11 C23A 35.7(11) . . ?
C24A N11 C23A 120.9(12) . . ?
C22 N11 C24B 110.9(9) . . ?
C23B N11 C24B 112.2(13) . . ?
C24A N11 C24B 62.5(11) . . ?
C23A N11 C24B 105.9(12) . . ?
C25 N12 C27 122.9(4) . . ?
C25 N12 C26 119.9(4) . . ?
C27 N12 C26 117.1(4) . . ?
C28 N13 C30 121.0(4) . . ?
C28 N13 C29 122.5(4) . . ?
C30 N13 C29 116.4(4) . . ?
C19 O1 Mn1 117.3(4) . . ?
C22 O2 Mn1 132.0(4) . . ?
C25 O3 Mn1 127.7(3) . . ?
C28 O4 Mn1 132.0(3) . . ?
O5 S1 O6 113.7(3) . . ?
O5 S1 O7 115.5(3) . . ?
O6 S1 O7 115.2(3) . . ?
O5 S1 C31 105.2(3) . . ?
O6 S1 C31 102.6(3) . . ?
O7 S1 C31 102.3(2) . . ?
F3 C31 F2 107.8(5) . . ?
F3 C31 F1 107.1(5) . . ?
F2 C31 F1 107.0(5) . . ?
F3 C31 S1 112.3(4) . . ?
F2 C31 S1 111.9(4) . . ?
F1 C31 S1 110.4(4) . . ?
C1SA N1S C1SB 48.3(16) . . ?
C1SA N1S C3SA 147.0(19) . . ?
C1SB N1S C3SA 114(2) . . ?
C1SA N1S C3SB 91(2) . . ?
C1SB N1S C3SB 108(2) . . ?
C3SA N1S C3SB 65.9(16) . . ?
C1SA N1S C2SB 160(2) . . ?
C1SB N1S C2SB 149(2) . . ?
C3SA N1S C2SB 49.5(13) . . ?
C3SB N1S C2SB 89.8(18) . . ?
C1SA N1S C2SA 93.1(19) . . ?
C1SB N1S C2SA 115(2) . . ?
C3SA N1S C2SA 119.4(15) . . ?
C3SB N1S C2SA 126.0(17) . . ?
C2SB N1S C2SA 70.3(16) . . ?
O1SA C1SA N1S 130(3) . . ?
O1SB C1SB N1S 120(5) . . ?

loop_
_geom_torsion_atom_site_label_1
_geom_torsion_atom_site_label_2
_geom_torsion_atom_site_label_3
_geom_torsion_atom_site_label_4
_geom_torsion
_geom_torsion_site_symmetry_1
_geom_torsion_site_symmetry_2
_geom_torsion_site_symmetry_3
_geom_torsion_site_symmetry_4
_geom_torsion_publ_flag
N1 C2 C3 C4 2.1(6) . . . . ?
C1 C2 C3 C4 -178.1(5) . . . . ?
C2 C3 C4 N2 -2.5(6) . . . . ?
C2 C3 C4 C5 -179.1(6) . . . . ?
N3 C7 C8 C9 0.1(6) . . . . ?
C6 C7 C8 C9 179.9(5) . . . . ?
C7 C8 C9 N4 -1.4(6) . . . . ?
C7 C8 C9 C10 176.3(6) . . . . ?
N5 C12 C13 C14 -1.0(5) . . . . ?
C11 C12 C13 C14 179.2(5) . . . . ?
C12 C13 C14 N6 1.3(5) . . . . ?
C12 C13 C14 C15 179.1(5) . . . . ?
C18 Fe1 C16 N7 72(9) . . . . ?
C17 Fe1 C16 N7 -16(9) . . . . ?
N3 Fe1 C16 N7 163(9) . . . . ?
N1 Fe1 C16 N7 -108(9) . . . . ?
N5 Fe1 C16 N7 19(11) . . . . ?
C16 Fe1 C17 N8 141(14) . . . . ?
C18 Fe1 C17 N8 56(14) . . . . ?
N3 Fe1 C17 N8 3(23) . . . . ?
N1 Fe1 C17 N8 -127(14) . . . . ?
N5 Fe1 C17 N8 -36(14) . . . . ?
C16 Fe1 C18 N9 -53(18) . . . . ?
C17 Fe1 C18 N9 34(18) . . . . ?
N3 Fe1 C18 N9 -147(18) . . . . ?
N1 Fe1 C18 N9 -51(20) . . . . ?
N5 Fe1 C18 N9 124(18) . . . . ?
C3 C2 N1 N2 -0.8(5) . . . . ?
C1 C2 N1 N2 179.3(4) . . . . ?
C3 C2 N1 Fe1 -175.0(3) . . . . ?
C1 C2 N1 Fe1 5.1(8) . . . . ?
C16 Fe1 N1 C2 36.2(5) . . . . ?
C18 Fe1 N1 C2 34(4) . . . . ?
C17 Fe1 N1 C2 -50.7(5) . . . . ?
N3 Fe1 N1 C2 129.9(5) . . . . ?
N5 Fe1 N1 C2 -140.5(5) . . . . ?
C16 Fe1 N1 N2 -137.6(3) . . . . ?
C18 Fe1 N1 N2 -140(3) . . . . ?
C17 Fe1 N1 N2 135.5(3) . . . . ?
N3 Fe1 N1 N2 -43.8(3) . . . . ?
N5 Fe1 N1 N2 45.8(3) . . . . ?
C3 C4 N2 N1 2.1(6) . . . . ?
C5 C4 N2 N1 179.1(5) . . . . ?
C3 C4 N2 B1 179.8(5) . . . . ?
C5 C4 N2 B1 -3.3(8) . . . . ?
C2 N1 N2 C4 -0.8(5) . . . . ?
Fe1 N1 N2 C4 174.7(3) . . . . ?
C2 N1 N2 B1 -178.8(4) . . . . ?
Fe1 N1 N2 B1 -3.3(5) . . . . ?
N6 B1 N2 C4 125.7(5) . . . . ?
N4 B1 N2 C4 -117.5(5) . . . . ?
N6 B1 N2 N1 -56.8(5) . . . . ?
N4 B1 N2 N1 59.9(5) . . . . ?
C8 C7 N3 N4 1.3(5) . . . . ?
C6 C7 N3 N4 -178.6(5) . . . . ?
C8 C7 N3 Fe1 -173.4(4) . . . . ?
C6 C7 N3 Fe1 6.7(8) . . . . ?
C16 Fe1 N3 C7 -44.5(5) . . . . ?
C18 Fe1 N3 C7 40.6(5) . . . . ?
C17 Fe1 N3 C7 94(13) . . . . ?
N1 Fe1 N3 C7 -136.6(5) . . . . ?
N5 Fe1 N3 C7 133.0(5) . . . . ?
C16 Fe1 N3 N4 141.4(3) . . . . ?
C18 Fe1 N3 N4 -133.6(3) . . . . ?
C17 Fe1 N3 N4 -81(13) . . . . ?
N1 Fe1 N3 N4 49.2(3) . . . . ?
N5 Fe1 N3 N4 -41.2(3) . . . . ?
C8 C9 N4 N3 2.3(5) . . . . ?
C10 C9 N4 N3 -175.7(5) . . . . ?
C8 C9 N4 B1 -177.4(5) . . . . ?
C10 C9 N4 B1 4.6(8) . . . . ?
C7 N3 N4 C9 -2.2(5) . . . . ?
Fe1 N3 N4 C9 173.6(3) . . . . ?
C7 N3 N4 B1 177.5(4) . . . . ?
Fe1 N3 N4 B1 -6.7(5) . . . . ?
N2 B1 N4 C9 125.7(5) . . . . ?
N6 B1 N4 C9 -116.8(5) . . . . ?
N2 B1 N4 N3 -54.0(5) . . . . ?
N6 B1 N4 N3 63.5(5) . . . . ?
C13 C12 N5 N6 0.3(5) . . . . ?
C11 C12 N5 N6 -179.8(4) . . . . ?
C13 C12 N5 Fe1 -177.8(3) . . . . ?
C11 C12 N5 Fe1 2.1(7) . . . . ?
C16 Fe1 N5 C12 9(3) . . . . ?
C18 Fe1 N5 C12 -43.3(5) . . . . ?
C17 Fe1 N5 C12 45.2(5) . . . . ?
N3 Fe1 N5 C12 -134.3(4) . . . . ?
N1 Fe1 N5 C12 136.4(4) . . . . ?
C16 Fe1 N5 N6 -169(2) . . . . ?
C18 Fe1 N5 N6 138.8(3) . . . . ?
C17 Fe1 N5 N6 -132.7(3) . . . . ?
N3 Fe1 N5 N6 47.8(3) . . . . ?
N1 Fe1 N5 N6 -41.5(3) . . . . ?
C13 C14 N6 N5 -1.1(5) . . . . ?
C15 C14 N6 N5 -179.1(4) . . . . ?
C13 C14 N6 B1 -176.3(4) . . . . ?
C15 C14 N6 B1 5.7(7) . . . . ?
C12 N5 N6 C14 0.5(5) . . . . ?
Fe1 N5 N6 C14 179.0(3) . . . . ?
C12 N5 N6 B1 176.5(4) . . . . ?
Fe1 N5 N6 B1 -5.1(5) . . . . ?
N2 B1 N6 C14 -123.7(5) . . . . ?
N4 B1 N6 C14 119.2(5) . . . . ?
N2 B1 N6 N5 61.5(5) . . . . ?
N4 B1 N6 N5 -55.6(5) . . . . ?
Fe1 C16 N7 Mn1 40(13) . . . 3_776 ?
Fe1 C18 N9 Mn1 -71(23) . . . . ?
O3 Mn1 N9 C18 27(8) . . . . ?
O2 Mn1 N9 C18 -63(8) . . . . ?
O4 Mn1 N9 C18 -153(8) . . . . ?
O1 Mn1 N9 C18 -79(8) . . . . ?
N7 Mn1 N9 C18 117(8) 3_776 . . . ?
O1 C19 N10 C20 -3.2(10) . . . . ?
O1 C19 N10 C21 179.0(6) . . . . ?
O2 C22 N11 C23B 159.3(16) . . . . ?
O2 C22 N11 C24A 31.4(14) . . . . ?
O2 C22 N11 C23A -160.6(11) . . . . ?
O2 C22 N11 C24B -38.0(15) . . . . ?
O3 C25 N12 C27 178.2(5) . . . . ?
O3 C25 N12 C26 0.4(7) . . . . ?
O4 C28 N13 C30 2.7(8) . . . . ?
O4 C28 N13 C29 178.9(5) . . . . ?
N10 C19 O1 Mn1 -165.1(5) . . . . ?
O3 Mn1 O1 C19 -151.3(4) . . . . ?
N9 Mn1 O1 C19 -45.7(14) . . . . ?
O2 Mn1 O1 C19 -60.8(4) . . . . ?
O4 Mn1 O1 C19 29.2(4) . . . . ?
N7 Mn1 O1 C19 118.7(4) 3_776 . . . ?
N11 C22 O2 Mn1 -170.6(5) . . . . ?
O3 Mn1 O2 C22 26.9(6) . . . . ?
N9 Mn1 O2 C22 116.9(6) . . . . ?
O4 Mn1 O2 C22 -150.2(6) . . . . ?
O1 Mn1 O2 C22 -64.9(6) . . . . ?
N7 Mn1 O2 C22 -81(6) 3_776 . . . ?
N12 C25 O3 Mn1 163.6(3) . . . . ?
N9 Mn1 O3 C25 21.9(4) . . . . ?
O2 Mn1 O3 C25 109.6(4) . . . . ?
O4 Mn1 O3 C25 -155(2) . . . . ?
O1 Mn1 O3 C25 -164.6(4) . . . . ?
N7 Mn1 O3 C25 -71.9(4) 3_776 . . . ?
N13 C28 O4 Mn1 -158.5(4) . . . . ?
O3 Mn1 O4 C28 91(3) . . . . ?
N9 Mn1 O4 C28 -85.5(5) . . . . ?
O2 Mn1 O4 C28 -173.2(5) . . . . ?
O1 Mn1 O4 C28 101.0(5) . . . . ?
N7 Mn1 O4 C28 8.3(5) 3_776 . . . ?
O5 S1 C31 F3 -179.7(4) . . . . ?
O6 S1 C31 F3 61.1(5) . . . . ?
O7 S1 C31 F3 -58.6(5) . . . . ?
O5 S1 C31 F2 58.9(5) . . . . ?
O6 S1 C31 F2 -60.3(5) . . . . ?
O7 S1 C31 F2 180.0(5) . . . . ?
O5 S1 C31 F1 -60.2(4) . . . . ?
O6 S1 C31 F1 -179.4(4) . . . . ?
O7 S1 C31 F1 60.9(4) . . . . ?
C1SB N1S C1SA O1SA 65(5) . . . . ?
C3SA N1S C1SA O1SA 133(4) . . . . ?
C3SB N1S C1SA O1SA 178(5) . . . . ?
C2SB N1S C1SA O1SA -89(8) . . . . ?
C2SA N1S C1SA O1SA -56(5) . . . . ?
C1SA N1S C1SB O1SB 36(4) . . . . ?
C3SA N1S C1SB O1SB -111(5) . . . . ?
C3SB N1S C1SB O1SB -40(5) . . . . ?
C2SB N1S C1SB O1SB -161(4) . . . . ?
C2SA N1S C1SB O1SB 106(5) . . . . ?

_diffrn_measured_fraction_theta_max 0.998
_diffrn_reflns_theta_full        25.00
_diffrn_measured_fraction_theta_full 0.998
_refine_diff_density_max         1.176
_refine_diff_density_min         -0.562
_refine_diff_density_rms         0.104

#======END

#((Tp*FeIII(CN)3-CoII(DMF)4)2-(OTf)2).2DMF

data_k04009
_database_code_depnum_ccdc_archive 'CCDC 256540'

_audit_creation_method           SHELXL-97
_chemical_name_systematic        
;
?
;
_chemical_name_common            ?
_chemical_melting_point          ?
_chemical_formula_moiety         ((Tp*FeIII(CN)3-CoII(DMF)4)2-(OTf)2).2DMF
_chemical_formula_sum            'C68 H116 B2 Co2 F6 Fe2 N28 O16 S2'
_chemical_formula_weight         2011.19

loop_
_atom_type_symbol
_atom_type_description
_atom_type_scat_dispersion_real
_atom_type_scat_dispersion_imag
_atom_type_scat_source
C C .0033 .0016 'International Tables Vol C Tables 4.2.6.8 and 6.1.1.4'
H H .0000 .0000 'International Tables Vol C Tables 4.2.6.8 and 6.1.1.4'
B B .0013 .0007 'International Tables Vol C Tables 4.2.6.8 and 6.1.1.4'
N N .0061 .0033 'International Tables Vol C Tables 4.2.6.8 and 6.1.1.4'
O O .0106 .0060 'International Tables Vol C Tables 4.2.6.8 and 6.1.1.4'
S S .1246 .1234 'International Tables Vol C Tables 4.2.6.8 and 6.1.1.4'
Fe Fe .3463 .8444 'International Tables Vol C Tables 4.2.6.8 and 6.1.1.4'
Co Co .3494 .9721 'International Tables Vol C Tables 4.2.6.8 and 6.1.1.4'
F F .0171 .0103 'International Tables Vol C Tables 4.2.6.8 and 6.1.1.4'

_symmetry_cell_setting           monoclinic
_symmetry_space_group_name_H-M   'P 21/n'

loop_
_symmetry_equiv_pos_as_xyz
'x, y, z'
'-x+1/2, y+1/2, -z+1/2'
'-x, -y, -z'
'x-1/2, -y-1/2, z-1/2'

_cell_length_a                   15.3587(2)
_cell_length_b                   13.1573(2)
_cell_length_c                   24.1959(4)
_cell_angle_alpha                90.00
_cell_angle_beta                 108.3940(7)
_cell_angle_gamma                90.00
_cell_volume                     4639.67(12)
_cell_formula_units_Z            2
_cell_measurement_temperature    90.0(2)
_cell_measurement_reflns_used    11073
_cell_measurement_theta_min      1.00
_cell_measurement_theta_max      27.48

_exptl_crystal_description       plate
_exptl_crystal_colour            red
_exptl_crystal_size_max          0.30
_exptl_crystal_size_mid          0.30
_exptl_crystal_size_min          0.06
_exptl_crystal_density_meas      ?
_exptl_crystal_density_diffrn    1.440
_exptl_crystal_density_method    'not measured'
_exptl_crystal_F_000             2100
_exptl_absorpt_coefficient_mu    0.789
_exptl_absorpt_correction_type   multi-scan
_exptl_absorpt_correction_T_min  0.7977
_exptl_absorpt_correction_T_max  0.9542
_exptl_absorpt_process_details   'Scalepack (Otwinowski & Minor, 1997)'

_exptl_special_details           
;
?
;

_diffrn_ambient_temperature      90.0(2)
_diffrn_radiation_wavelength     0.71073
_diffrn_radiation_type           MoK\a
_diffrn_radiation_source         'fine-focus sealed tube'
_diffrn_radiation_monochromator  graphite
_diffrn_measurement_device_type  'Nonius KappaCCD diffractometer'
_diffrn_measurement_method       '\w scans at fixed \c == 55\%'
_diffrn_detector_area_resol_mean 18
_diffrn_standards_number         ?
_diffrn_standards_interval_count ?
_diffrn_standards_interval_time  ?
_diffrn_standards_decay_%        ?
_diffrn_reflns_number            20724
_diffrn_reflns_av_R_equivalents  0.0714
_diffrn_reflns_av_sigmaI/netI    0.0993
_diffrn_reflns_limit_h_min       -19
_diffrn_reflns_limit_h_max       19
_diffrn_reflns_limit_k_min       -17
_diffrn_reflns_limit_k_max       17
_diffrn_reflns_limit_l_min       -31
_diffrn_reflns_limit_l_max       31
_diffrn_reflns_theta_min         1.40
_diffrn_reflns_theta_max         27.46
_reflns_number_total             10613
_reflns_number_gt                6471
_reflns_threshold_expression     >2\s(I)

_computing_data_collection       'COLLECT (Nonius, 1998)'
_computing_cell_refinement       'SCALEPACK (Otwinowski & Minor, 1997)'
_computing_data_reduction        'DENZO-SMN (Otwinowski & Minor, 1997)'
_computing_structure_solution    'SHELXS-97 (Sheldrick, 1990)'
_computing_structure_refinement  'SHELXL-97 (Sheldrick, 1997)'
_computing_molecular_graphics    'XP in SHELXTL (Sheldrick, 1994)'
_computing_publication_material  
;
SHELX97-2 (Sheldrick, 1997) and local procedures
;

_refine_special_details          
;
Refinement of F^2^ against ALL reflections.  The weighted R-factor wR and
goodness of fit S are based on F^2^, conventional R-factors R are based
on F, with F set to zero for negative F^2^. The threshold expression of
F^2^ > 2sigma(F^2^) is used only for calculating R-factors(gt) etc. and is
not relevant to the choice of reflections for refinement.  R-factors based
on F^2^ are statistically about twice as large as those based on F, and R-
factors based on ALL data will be even larger.
;

_refine_ls_structure_factor_coef Fsqd
_refine_ls_matrix_type           full
_refine_ls_weighting_scheme      calc
_refine_ls_weighting_details     
'calc w==1/[\s^2^(Fo^2^)+(0.0453P)^2^+0.3644P] where P==(Fo^2^+2Fc^2^)/3'
_atom_sites_solution_primary     direct
_atom_sites_solution_secondary   difmap
_atom_sites_solution_hydrogens   geom
_refine_ls_hydrogen_treatment    constr
_refine_ls_extinction_method     none
_refine_ls_extinction_coef       ?
_refine_ls_number_reflns         10613
_refine_ls_number_parameters     634
_refine_ls_number_restraints     162
_refine_ls_R_factor_all          0.1097
_refine_ls_R_factor_gt           0.0492
_refine_ls_wR_factor_ref         0.1088
_refine_ls_wR_factor_gt          0.0938
_refine_ls_goodness_of_fit_ref   1.019
_refine_ls_restrained_S_all      1.022
_refine_ls_shift/su_max          3.734
_refine_ls_shift/su_mean         0.058

loop_
_atom_site_label
_atom_site_type_symbol
_atom_site_fract_x
_atom_site_fract_y
_atom_site_fract_z
_atom_site_U_iso_or_equiv
_atom_site_adp_type
_atom_site_occupancy
_atom_site_symmetry_multiplicity
_atom_site_calc_flag
_atom_site_refinement_flags
_atom_site_disorder_assembly
_atom_site_disorder_group
Fe1 Fe 0.11870(3) 0.71752(3) 0.095622(17) 0.01449(11) Uani 1 1 d . . .
B1 B 0.1878(2) 0.9371(3) 0.11308(14) 0.0169(8) Uani 1 1 d . . .
H1 H 0.2106 1.0088 0.1186 0.020 Uiso 1 1 calc R . .
Co1 Co 0.21278(3) 0.40691(3) -0.002279(16) 0.01481(11) Uani 1 1 d . . .
N1 N 0.07759(15) 0.82539(17) 0.14094(9) 0.0145(5) Uani 1 1 d . . .
N2 N 0.11911(15) 0.91829(17) 0.14625(9) 0.0137(5) Uani 1 1 d . . .
C1 C -0.0461(2) 0.7465(2) 0.17539(13) 0.0247(7) Uani 1 1 d . . .
H1A H -0.0871 0.7286 0.1366 0.037 Uiso 1 1 calc R . .
H1B H -0.0826 0.7684 0.1999 0.037 Uiso 1 1 calc R . .
H1C H -0.0093 0.6871 0.1930 0.037 Uiso 1 1 calc R . .
C2 C 0.01598(19) 0.8311(2) 0.17026(12) 0.0171(7) Uani 1 1 d . . .
C3 C 0.01957(19) 0.9273(2) 0.19428(12) 0.0187(7) Uani 1 1 d . . .
H3 H -0.0159 0.9514 0.2174 0.022 Uiso 1 1 calc R . .
C4 C 0.08460(19) 0.9815(2) 0.17819(12) 0.0167(7) Uani 1 1 d . . .
C5 C 0.1162(2) 1.0885(2) 0.19133(13) 0.0229(7) Uani 1 1 d . . .
H5A H 0.1787 1.0889 0.2189 0.034 Uiso 1 1 calc R . .
H5B H 0.0751 1.1243 0.2085 0.034 Uiso 1 1 calc R . .
H5C H 0.1158 1.1227 0.1552 0.034 Uiso 1 1 calc R . .
N3 N 0.10815(15) 0.81725(17) 0.03219(10) 0.0147(5) Uani 1 1 d . . .
N4 N 0.13726(15) 0.91528(17) 0.04829(10) 0.0159(5) Uani 1 1 d . . .
C6 C 0.0324(2) 0.7255(2) -0.06143(12) 0.0273(8) Uani 1 1 d . . .
H6A H 0.0765 0.6694 -0.0501 0.041 Uiso 1 1 calc R . .
H6B H 0.0195 0.7401 -0.1030 0.041 Uiso 1 1 calc R . .
H6C H -0.0247 0.7062 -0.0541 0.041 Uiso 1 1 calc R . .
C7 C 0.0717(2) 0.8179(2) -0.02658(12) 0.0194(7) Uani 1 1 d . . .
C8 C 0.0762(2) 0.9157(2) -0.04684(13) 0.0246(7) Uani 1 1 d . . .
H8 H 0.0549 0.9374 -0.0863 0.030 Uiso 1 1 calc R . .
C9 C 0.1174(2) 0.9755(2) 0.00100(13) 0.0215(7) Uani 1 1 d . . .
C10 C 0.1369(2) 1.0874(2) 0.00492(14) 0.0300(8) Uani 1 1 d . . .
H10A H 0.1155 1.1172 0.0354 0.045 Uiso 1 1 calc R . .
H10B H 0.1049 1.1195 -0.0325 0.045 Uiso 1 1 calc R . .
H10C H 0.2031 1.0985 0.0144 0.045 Uiso 1 1 calc R . .
N5 N 0.24900(15) 0.75953(17) 0.13203(9) 0.0150(5) Uani 1 1 d . . .
N6 N 0.26757(15) 0.86204(17) 0.13414(10) 0.0155(5) Uani 1 1 d . . .
C11 C 0.3419(2) 0.5978(2) 0.15581(12) 0.0232(7) Uani 1 1 d . . .
H11A H 0.2960 0.5684 0.1715 0.035 Uiso 1 1 calc R . .
H11B H 0.4035 0.5812 0.1816 0.035 Uiso 1 1 calc R . .
H11C H 0.3337 0.5699 0.1169 0.035 Uiso 1 1 calc R . .
C12 C 0.33047(19) 0.7107(2) 0.15182(12) 0.0170(7) Uani 1 1 d . . .
C13 C 0.4004(2) 0.7828(2) 0.16634(12) 0.0200(7) Uani 1 1 d . . .
H13 H 0.4643 0.7696 0.1817 0.024 Uiso 1 1 calc R . .
C14 C 0.3595(2) 0.8771(2) 0.15425(12) 0.0191(7) Uani 1 1 d . . .
C15 C 0.4016(2) 0.9809(2) 0.16055(14) 0.0276(8) Uani 1 1 d . . .
H15A H 0.3740 1.0197 0.1247 0.041 Uiso 1 1 calc R . .
H15B H 0.4678 0.9748 0.1677 0.041 Uiso 1 1 calc R . .
H15C H 0.3904 1.0161 0.1934 0.041 Uiso 1 1 calc R . .
C16 C -0.0044(2) 0.6703(2) 0.05903(12) 0.0158(6) Uani 1 1 d . . .
N7 N -0.07737(17) 0.63999(18) 0.03730(10) 0.0171(5) Uani 1 1 d . . .
C17 C 0.12647(19) 0.6235(2) 0.15778(12) 0.0173(7) Uani 1 1 d . . .
N8 N 0.12940(17) 0.56730(19) 0.19532(11) 0.0256(6) Uani 1 1 d . . .
C18 C 0.15412(19) 0.6074(2) 0.05549(12) 0.0160(6) Uani 1 1 d . . .
N9 N 0.17482(16) 0.53741(18) 0.03307(10) 0.0174(6) Uani 1 1 d . . .
O1A O 0.23069(13) 0.32527(14) 0.07573(8) 0.0203(5) Uani 1 1 d . . .
C1A C 0.21047(19) 0.3495(2) 0.11998(12) 0.0185(7) Uani 1 1 d . . .
H1A1 H 0.1656 0.4009 0.1165 0.022 Uiso 1 1 calc R . .
N1A N 0.24856(16) 0.30701(18) 0.17178(10) 0.0190(6) Uani 1 1 d . . .
C2A C 0.3216(2) 0.2326(2) 0.18034(13) 0.0291(8) Uani 1 1 d . . .
H2A1 H 0.3171 0.2004 0.1430 0.044 Uiso 1 1 calc R . .
H2A2 H 0.3157 0.1806 0.2080 0.044 Uiso 1 1 calc R . .
H2A3 H 0.3812 0.2665 0.1958 0.044 Uiso 1 1 calc R . .
C3A C 0.2252(2) 0.3383(2) 0.22281(12) 0.0240(7) Uani 1 1 d . . .
H3A1 H 0.2796 0.3665 0.2518 0.036 Uiso 1 1 calc R . .
H3A2 H 0.2032 0.2794 0.2394 0.036 Uiso 1 1 calc R . .
H3A3 H 0.1769 0.3901 0.2117 0.036 Uiso 1 1 calc R . .
O1B O 0.25089(13) 0.27605(14) -0.03776(8) 0.0198(5) Uani 1 1 d . . .
C1B C 0.3022(2) 0.2754(2) -0.06824(13) 0.0249(7) Uani 1 1 d . . .
H1B1 H 0.3351 0.3359 -0.0698 0.030 Uiso 1 1 calc R . .
N1B N 0.31461(18) 0.1973(2) -0.09860(11) 0.0276(6) Uani 1 1 d . . .
C2B C 0.2664(3) 0.1052(3) -0.0993(2) 0.0756(16) Uani 1 1 d . . .
H2B1 H 0.3043 0.0590 -0.0697 0.113 Uiso 1 1 calc R . .
H2B2 H 0.2523 0.0735 -0.1378 0.113 Uiso 1 1 calc R . .
H2B3 H 0.2091 0.1195 -0.0910 0.113 Uiso 1 1 calc R . .
C3B C 0.3816(3) 0.1996(3) -0.13005(17) 0.0571(12) Uani 1 1 d . . .
H3B1 H 0.4076 0.2680 -0.1279 0.086 Uiso 1 1 calc R . .
H3B2 H 0.3513 0.1815 -0.1709 0.086 Uiso 1 1 calc R . .
H3B3 H 0.4307 0.1508 -0.1125 0.086 Uiso 1 1 calc R . .
O1C O 0.35467(13) 0.44312(15) 0.03279(8) 0.0221(5) Uani 1 1 d . . .
C1C C 0.4054(2) 0.3798(2) 0.06677(13) 0.0244(7) Uani 1 1 d . . .
H1C1 H 0.3818 0.3133 0.0677 0.029 Uiso 1 1 calc R . .
N1C N 0.48906(18) 0.3990(2) 0.10133(11) 0.0303(7) Uani 1 1 d . . .
C2C C 0.5336(2) 0.4965(3) 0.10060(15) 0.0431(10) Uani 1 1 d . . .
H2C1 H 0.4873 0.5474 0.0816 0.065 Uiso 1 1 calc R . .
H2C2 H 0.5778 0.4898 0.0791 0.065 Uiso 1 1 calc R . .
H2C3 H 0.5658 0.5179 0.1406 0.065 Uiso 1 1 calc R . .
C3C C 0.5433(2) 0.3199(3) 0.13939(15) 0.0399(9) Uani 1 1 d . . .
H3C1 H 0.5040 0.2615 0.1398 0.060 Uiso 1 1 calc R . .
H3C2 H 0.5691 0.3467 0.1790 0.060 Uiso 1 1 calc R . .
H3C3 H 0.5933 0.2985 0.1249 0.060 Uiso 1 1 calc R . .
O1D O 0.21050(13) 0.48817(14) -0.07684(8) 0.0195(5) Uani 1 1 d . . .
C1D C 0.1398(2) 0.5160(2) -0.11553(12) 0.0202(7) Uani 1 1 d . . .
H1D H 0.0829 0.4871 -0.1158 0.024 Uiso 1 1 calc R . .
N1D N 0.13894(16) 0.58330(18) -0.15622(10) 0.0198(6) Uani 1 1 d . . .
C2D C 0.2230(2) 0.6319(2) -0.15820(14) 0.0300(8) Uani 1 1 d . . .
H2D1 H 0.2741 0.6113 -0.1241 0.045 Uiso 1 1 calc R . .
H2D2 H 0.2158 0.7059 -0.1581 0.045 Uiso 1 1 calc R . .
H2D3 H 0.2358 0.6112 -0.1938 0.045 Uiso 1 1 calc R . .
C3D C 0.0547(2) 0.6110(2) -0.20167(13) 0.0327(8) Uani 1 1 d . . .
H3D1 H 0.0031 0.5733 -0.1960 0.049 Uiso 1 1 calc R . .
H3D2 H 0.0604 0.5941 -0.2398 0.049 Uiso 1 1 calc R . .
H3D3 H 0.0440 0.6841 -0.1998 0.049 Uiso 1 1 calc R . .
S1E S 0.82568(6) 0.08568(6) 0.22886(3) 0.0255(2) Uani 1 1 d . . .
O1E O 0.83531(16) -0.02094(16) 0.24321(10) 0.0389(6) Uani 1 1 d . . .
O2E O 0.79521(18) 0.10913(16) 0.16772(9) 0.0408(6) Uani 1 1 d . . .
O3E O 0.89808(15) 0.14932(18) 0.26374(10) 0.0405(6) Uani 1 1 d . . .
C1E C 0.7272(2) 0.1212(3) 0.25167(15) 0.0320(8) Uani 1 1 d . . .
F1E F 0.65284(13) 0.06892(16) 0.22319(10) 0.0544(6) Uani 1 1 d . . .
F2E F 0.70715(13) 0.21994(14) 0.24221(9) 0.0442(5) Uani 1 1 d . . .
F3E F 0.74282(13) 0.10452(13) 0.30836(8) 0.0389(5) Uani 1 1 d . . .
O1F O 0.4862(5) 0.1638(5) 0.0243(4) 0.148(3) Uani 0.714(4) 1 d PDU A 1
H1F H 0.4590 0.1202 0.0382 0.222 Uiso 0.714(4) 1 calc PR A 1
C1F C 0.5649(4) 0.1372(6) 0.0325(3) 0.073(2) Uani 0.714(4) 1 d PDU A 1
H1F H 0.5874 0.0739 0.0501 0.088 Uiso 0.714(4) 1 calc PR A 1
N1F N 0.6185(6) 0.2030(7) 0.0151(7) 0.059(2) Uani 0.714(4) 1 d PDU A 1
C2F C 0.5844(5) 0.3008(5) -0.0071(3) 0.0579(18) Uani 0.714(4) 1 d PDU A 1
H2F1 H 0.5655 0.2996 -0.0498 0.087 Uiso 0.714(4) 1 calc PR A 1
H2F2 H 0.6328 0.3517 0.0076 0.087 Uiso 0.714(4) 1 calc PR A 1
H2F3 H 0.5316 0.3182 0.0056 0.087 Uiso 0.714(4) 1 calc PR A 1
C3F C 0.7135(4) 0.1849(6) 0.0238(3) 0.069(2) Uani 0.714(4) 1 d PDU A 1
H3F1 H 0.7399 0.1467 0.0600 0.103 Uiso 0.714(4) 1 calc PR A 1
H3F2 H 0.7456 0.2499 0.0264 0.103 Uiso 0.714(4) 1 calc PR A 1
H3F3 H 0.7202 0.1455 -0.0090 0.103 Uiso 0.714(4) 1 calc PR A 1
O1F' O 0.5047(6) 0.3202(7) -0.0084(4) 0.045(3) Uani 0.286(4) 1 d PDU A 2
H1F' H 0.4529 0.3158 -0.0339 0.067 Uiso 0.286(4) 1 calc PR A 2
C1F' C 0.5385(12) 0.2382(15) 0.0012(9) 0.094(5) Uani 0.286(4) 1 d PDU A 2
H1F' H 0.4972 0.1827 -0.0039 0.112 Uiso 0.286(4) 1 calc PR A 2
N1F' N 0.6275(15) 0.2149(16) 0.0181(19) 0.054(5) Uani 0.286(4) 1 d PDU A 2
C2F' C 0.6827(12) 0.2833(12) -0.0031(7) 0.071(5) Uani 0.286(4) 1 d PDU A 2
H2F4 H 0.7134 0.2454 -0.0265 0.106 Uiso 0.286(4) 1 calc PR A 2
H2F5 H 0.7289 0.3151 0.0300 0.106 Uiso 0.286(4) 1 calc PR A 2
H2F6 H 0.6435 0.3359 -0.0271 0.106 Uiso 0.286(4) 1 calc PR A 2
C3F' C 0.6587(16) 0.1144(13) 0.0139(9) 0.117(7) Uani 0.286(4) 1 d PDU A 2
H3F4 H 0.7061 0.0963 0.0504 0.176 Uiso 0.286(4) 1 calc PR A 2
H3F5 H 0.6842 0.1105 -0.0183 0.176 Uiso 0.286(4) 1 calc PR A 2
H3F6 H 0.6071 0.0670 0.0069 0.176 Uiso 0.286(4) 1 calc PR A 2

loop_
_atom_site_aniso_label
_atom_site_aniso_U_11
_atom_site_aniso_U_22
_atom_site_aniso_U_33
_atom_site_aniso_U_23
_atom_site_aniso_U_13
_atom_site_aniso_U_12
Fe1 0.0160(2) 0.0143(2) 0.0128(2) -0.00017(18) 0.00399(17) 0.00086(19)
B1 0.0177(18) 0.0128(18) 0.0187(19) -0.0013(14) 0.0037(15) -0.0035(15)
Co1 0.0160(2) 0.0149(2) 0.0129(2) -0.00070(17) 0.00373(16) 0.00116(18)
N1 0.0156(13) 0.0130(13) 0.0139(13) -0.0018(10) 0.0030(10) -0.0005(11)
N2 0.0175(13) 0.0113(13) 0.0115(12) -0.0014(10) 0.0037(10) -0.0010(11)
C1 0.0256(18) 0.0275(19) 0.0250(18) -0.0049(15) 0.0137(15) -0.0022(15)
C2 0.0137(15) 0.0221(17) 0.0148(16) 0.0027(13) 0.0035(13) 0.0034(13)
C3 0.0184(16) 0.0235(18) 0.0148(16) -0.0018(13) 0.0062(13) 0.0047(14)
C4 0.0187(16) 0.0173(16) 0.0119(15) 0.0000(13) 0.0015(13) 0.0061(14)
C5 0.0317(18) 0.0169(17) 0.0208(17) -0.0038(14) 0.0091(14) 0.0032(15)
N3 0.0198(13) 0.0107(13) 0.0145(13) -0.0007(10) 0.0066(11) -0.0005(11)
N4 0.0193(13) 0.0142(13) 0.0142(13) 0.0005(11) 0.0056(10) -0.0015(11)
C6 0.0338(19) 0.030(2) 0.0143(16) -0.0004(14) 0.0024(14) -0.0011(16)
C7 0.0187(16) 0.0238(18) 0.0136(16) 0.0012(13) 0.0021(13) 0.0013(14)
C8 0.0273(18) 0.0268(19) 0.0175(16) 0.0093(15) 0.0040(14) 0.0008(15)
C9 0.0222(17) 0.0236(18) 0.0191(17) 0.0069(14) 0.0070(14) 0.0016(15)
C10 0.040(2) 0.0205(18) 0.0309(19) 0.0080(15) 0.0130(16) -0.0003(16)
N5 0.0170(13) 0.0145(14) 0.0128(13) -0.0015(10) 0.0039(10) 0.0003(11)
N6 0.0167(13) 0.0123(13) 0.0181(13) -0.0029(11) 0.0062(11) -0.0009(11)
C11 0.0201(17) 0.0252(18) 0.0198(17) -0.0030(14) 0.0001(13) 0.0076(15)
C12 0.0174(16) 0.0189(16) 0.0143(15) -0.0019(13) 0.0044(13) 0.0048(14)
C13 0.0142(16) 0.0262(18) 0.0177(16) -0.0061(14) 0.0024(13) 0.0027(14)
C14 0.0185(17) 0.0236(18) 0.0158(16) -0.0049(13) 0.0062(13) -0.0001(14)
C15 0.0201(18) 0.0239(19) 0.038(2) -0.0079(15) 0.0081(15) -0.0055(15)
C16 0.0216(17) 0.0134(16) 0.0137(16) 0.0008(13) 0.0072(13) 0.0058(14)
N7 0.0195(14) 0.0159(14) 0.0152(13) -0.0014(11) 0.0043(11) -0.0012(12)
C17 0.0168(16) 0.0136(16) 0.0199(17) -0.0059(13) 0.0037(13) -0.0008(13)
N8 0.0342(17) 0.0228(15) 0.0224(15) 0.0005(12) 0.0127(13) 0.0003(13)
C18 0.0146(15) 0.0201(18) 0.0100(15) 0.0035(13) -0.0008(12) -0.0020(13)
N9 0.0194(14) 0.0175(14) 0.0141(13) 0.0006(11) 0.0034(11) 0.0017(12)
O1A 0.0257(12) 0.0195(12) 0.0150(11) 0.0015(9) 0.0054(9) 0.0035(10)
C1A 0.0182(16) 0.0145(16) 0.0211(17) 0.0012(13) 0.0039(13) -0.0008(13)
N1A 0.0255(14) 0.0181(14) 0.0127(13) 0.0011(11) 0.0049(11) -0.0003(12)
C2A 0.0310(19) 0.031(2) 0.0255(18) 0.0101(15) 0.0088(15) 0.0080(16)
C3A 0.039(2) 0.0209(18) 0.0133(16) 0.0004(13) 0.0098(14) -0.0020(16)
O1B 0.0217(11) 0.0196(12) 0.0211(11) -0.0011(9) 0.0112(10) 0.0012(10)
C1B 0.0323(19) 0.0159(17) 0.0270(18) 0.0041(14) 0.0101(16) 0.0045(15)
N1B 0.0371(17) 0.0248(16) 0.0237(15) -0.0022(12) 0.0135(13) 0.0090(13)
C2B 0.061(3) 0.038(3) 0.136(5) -0.048(3) 0.042(3) -0.012(2)
C3B 0.085(3) 0.051(3) 0.056(3) 0.013(2) 0.052(3) 0.030(2)
O1C 0.0189(11) 0.0210(12) 0.0227(12) 0.0019(10) 0.0015(9) 0.0003(10)
C1C 0.0226(18) 0.0248(19) 0.0264(18) 0.0008(15) 0.0084(15) 0.0017(15)
N1C 0.0228(15) 0.0328(18) 0.0293(16) 0.0036(13) -0.0003(13) -0.0028(13)
C2C 0.033(2) 0.037(2) 0.045(2) -0.0021(18) -0.0066(18) -0.0149(18)
C3C 0.025(2) 0.048(2) 0.041(2) 0.0132(19) 0.0019(17) 0.0052(18)
O1D 0.0218(12) 0.0190(12) 0.0175(11) 0.0028(9) 0.0061(10) 0.0017(9)
C1D 0.0236(18) 0.0208(17) 0.0176(17) -0.0023(14) 0.0085(14) -0.0033(14)
N1D 0.0213(14) 0.0199(14) 0.0182(14) 0.0041(11) 0.0063(11) 0.0033(12)
C2D 0.034(2) 0.0245(19) 0.035(2) 0.0079(16) 0.0150(16) -0.0014(16)
C3D 0.032(2) 0.036(2) 0.0264(19) 0.0109(16) 0.0042(16) 0.0041(17)
S1E 0.0316(5) 0.0225(5) 0.0266(5) 0.0014(4) 0.0153(4) 0.0034(4)
O1E 0.0599(17) 0.0228(13) 0.0458(15) 0.0117(11) 0.0338(13) 0.0154(12)
O2E 0.0753(19) 0.0282(14) 0.0248(13) 0.0020(11) 0.0243(13) -0.0012(13)
O3E 0.0280(13) 0.0475(16) 0.0461(15) -0.0056(13) 0.0117(12) -0.0084(12)
C1E 0.031(2) 0.026(2) 0.041(2) 0.0107(17) 0.0151(17) 0.0045(17)
F1E 0.0252(12) 0.0595(15) 0.0712(16) 0.0100(12) 0.0048(11) -0.0120(11)
F2E 0.0498(13) 0.0323(12) 0.0630(15) 0.0207(11) 0.0354(12) 0.0192(10)
F3E 0.0541(13) 0.0348(12) 0.0401(12) 0.0093(10) 0.0326(10) 0.0077(10)
O1F 0.125(5) 0.151(6) 0.170(7) -0.011(5) 0.052(5) -0.030(5)
C1F 0.025(3) 0.099(5) 0.104(5) 0.011(4) 0.034(4) 0.015(4)
N1F 0.046(4) 0.078(5) 0.048(4) 0.007(4) 0.007(4) 0.028(4)
C2F 0.067(5) 0.064(4) 0.048(4) 0.008(3) 0.025(3) 0.008(4)
C3F 0.044(4) 0.099(6) 0.065(4) 0.027(4) 0.021(3) 0.028(4)
O1F' 0.037(6) 0.054(6) 0.050(6) 0.025(5) 0.022(5) 0.036(5)
C1F' 0.074(8) 0.114(9) 0.091(9) -0.013(9) 0.025(8) -0.016(8)
N1F' 0.040(7) 0.065(8) 0.065(9) 0.012(8) 0.027(7) -0.018(7)
C2F' 0.084(10) 0.074(10) 0.066(10) 0.000(8) 0.040(9) -0.007(9)
C3F' 0.116(14) 0.081(11) 0.116(13) 0.036(11) -0.020(13) 0.019(11)

_geom_special_details            
;
All esds (except the esd in the dihedral angle between two l.s. planes)
are estimated using the full covariance matrix.  The cell esds are taken
into account individually in the estimation of esds in distances, angles
and torsion angles; correlations between esds in cell parameters are only
used when they are defined by crystal symmetry.  An approximate (isotropic)
treatment of cell esds is used for estimating esds involving l.s. planes.
;

loop_
_geom_bond_atom_site_label_1
_geom_bond_atom_site_label_2
_geom_bond_distance
_geom_bond_site_symmetry_2
_geom_bond_publ_flag
Fe1 C18 1.916(3) . ?
Fe1 C16 1.921(3) . ?
Fe1 C17 1.922(3) . ?
Fe1 N3 1.987(2) . ?
Fe1 N5 1.993(2) . ?
Fe1 N1 2.013(2) . ?
B1 N6 1.531(4) . ?
B1 N2 1.534(4) . ?
B1 N4 1.541(4) . ?
B1 H1 1.0000 . ?
Co1 N7 2.077(2) 3_565 ?
Co1 N9 2.082(2) . ?
Co1 O1D 2.0878(19) . ?
Co1 O1B 2.0884(19) . ?
Co1 O1A 2.1130(19) . ?
Co1 O1C 2.1282(19) . ?
N1 C2 1.352(3) . ?
N1 N2 1.366(3) . ?
N2 C4 1.352(3) . ?
C1 C2 1.496(4) . ?
C1 H1A 0.9800 . ?
C1 H1B 0.9800 . ?
C1 H1C 0.9800 . ?
C2 C3 1.387(4) . ?
C3 C4 1.379(4) . ?
C3 H3 0.9500 . ?
C4 C5 1.491(4) . ?
C5 H5A 0.9800 . ?
C5 H5B 0.9800 . ?
C5 H5C 0.9800 . ?
N3 C7 1.354(3) . ?
N3 N4 1.380(3) . ?
N4 C9 1.345(3) . ?
C6 C7 1.495(4) . ?
C6 H6A 0.9800 . ?
C6 H6B 0.9800 . ?
C6 H6C 0.9800 . ?
C7 C8 1.387(4) . ?
C8 C9 1.377(4) . ?
C8 H8 0.9500 . ?
C9 C10 1.499(4) . ?
C10 H10A 0.9800 . ?
C10 H10B 0.9800 . ?
C10 H10C 0.9800 . ?
N5 C12 1.353(3) . ?
N5 N6 1.376(3) . ?
N6 C14 1.355(3) . ?
C11 C12 1.495(4) . ?
C11 H11A 0.9800 . ?
C11 H11B 0.9800 . ?
C11 H11C 0.9800 . ?
C12 C13 1.393(4) . ?
C13 C14 1.379(4) . ?
C13 H13 0.9500 . ?
C14 C15 1.498(4) . ?
C15 H15A 0.9800 . ?
C15 H15B 0.9800 . ?
C15 H15C 0.9800 . ?
C16 N7 1.149(3) . ?
N7 Co1 2.076(2) 3_565 ?
C17 N8 1.161(3) . ?
C18 N9 1.163(3) . ?
O1A C1A 1.247(3) . ?
C1A N1A 1.328(3) . ?
C1A H1A1 0.9500 . ?
N1A C3A 1.450(3) . ?
N1A C2A 1.454(4) . ?
C2A H2A1 0.9800 . ?
C2A H2A2 0.9800 . ?
C2A H2A3 0.9800 . ?
C3A H3A1 0.9800 . ?
C3A H3A2 0.9800 . ?
C3A H3A3 0.9800 . ?
O1B C1B 1.238(3) . ?
C1B N1B 1.311(4) . ?
C1B H1B1 0.9500 . ?
N1B C2B 1.417(4) . ?
N1B C3B 1.460(4) . ?
C2B H2B1 0.9800 . ?
C2B H2B2 0.9800 . ?
C2B H2B3 0.9800 . ?
C3B H3B1 0.9800 . ?
C3B H3B2 0.9800 . ?
C3B H3B3 0.9800 . ?
O1C C1C 1.253(3) . ?
C1C N1C 1.318(4) . ?
C1C H1C1 0.9500 . ?
N1C C2C 1.457(4) . ?
N1C C3C 1.463(4) . ?
C2C H2C1 0.9800 . ?
C2C H2C2 0.9800 . ?
C2C H2C3 0.9800 . ?
C3C H3C1 0.9800 . ?
C3C H3C2 0.9800 . ?
C3C H3C3 0.9800 . ?
O1D C1D 1.245(3) . ?
C1D N1D 1.321(3) . ?
C1D H1D 0.9500 . ?
N1D C2D 1.455(4) . ?
N1D C3D 1.455(4) . ?
C2D H2D1 0.9800 . ?
C2D H2D2 0.9800 . ?
C2D H2D3 0.9800 . ?
C3D H3D1 0.9800 . ?
C3D H3D2 0.9800 . ?
C3D H3D3 0.9800 . ?
S1E O3E 1.434(2) . ?
S1E O2E 1.437(2) . ?
S1E O1E 1.442(2) . ?
S1E C1E 1.827(3) . ?
C1E F1E 1.326(4) . ?
C1E F3E 1.334(4) . ?
C1E F2E 1.338(4) . ?
O1F C1F 1.213(8) . ?
O1F H1F 0.8512 . ?
C1F N1F 1.350(10) . ?
C1F H1F 0.9500 . ?
N1F C3F 1.427(8) . ?
N1F C2F 1.428(9) . ?
C2F H2F1 0.9800 . ?
C2F H2F2 0.9800 . ?
C2F H2F3 0.9800 . ?
C3F H3F1 0.9800 . ?
C3F H3F2 0.9800 . ?
C3F H3F3 0.9800 . ?
O1F' C1F' 1.188(17) . ?
O1F' H1F' 0.8400 . ?
C1F' N1F' 1.334(18) . ?
C1F' H1F' 0.9500 . ?
N1F' C3F' 1.420(18) . ?
N1F' C2F' 1.436(16) . ?
C2F' H2F4 0.9800 . ?
C2F' H2F5 0.9800 . ?
C2F' H2F6 0.9800 . ?
C3F' H3F4 0.9800 . ?
C3F' H3F5 0.9800 . ?
C3F' H3F6 0.9800 . ?

loop_
_geom_angle_atom_site_label_1
_geom_angle_atom_site_label_2
_geom_angle_atom_site_label_3
_geom_angle
_geom_angle_site_symmetry_1
_geom_angle_site_symmetry_3
_geom_angle_publ_flag
C18 Fe1 C16 85.25(11) . . ?
C18 Fe1 C17 87.26(12) . . ?
C16 Fe1 C17 87.78(12) . . ?
C18 Fe1 N3 94.30(10) . . ?
C16 Fe1 N3 91.67(10) . . ?
C17 Fe1 N3 178.30(11) . . ?
C18 Fe1 N5 91.59(10) . . ?
C16 Fe1 N5 176.80(11) . . ?
C17 Fe1 N5 91.54(10) . . ?
N3 Fe1 N5 89.09(9) . . ?
C18 Fe1 N1 175.69(10) . . ?
C16 Fe1 N1 92.69(10) . . ?
C17 Fe1 N1 88.88(10) . . ?
N3 Fe1 N1 89.54(9) . . ?
N5 Fe1 N1 90.43(9) . . ?
N6 B1 N2 109.4(2) . . ?
N6 B1 N4 108.1(2) . . ?
N2 B1 N4 107.1(2) . . ?
N6 B1 H1 110.7 . . ?
N2 B1 H1 110.7 . . ?
N4 B1 H1 110.7 . . ?
N7 Co1 N9 92.21(9) 3_565 . ?
N7 Co1 O1D 93.33(8) 3_565 . ?
N9 Co1 O1D 90.13(8) . . ?
N7 Co1 O1B 87.81(8) 3_565 . ?
N9 Co1 O1B 179.97(10) . . ?
O1D Co1 O1B 89.85(7) . . ?
N7 Co1 O1A 92.57(8) 3_565 . ?
N9 Co1 O1A 91.53(8) . . ?
O1D Co1 O1A 173.81(8) . . ?
O1B Co1 O1A 88.49(7) . . ?
N7 Co1 O1C 175.52(9) 3_565 . ?
N9 Co1 O1C 92.06(8) . . ?
O1D Co1 O1C 88.04(8) . . ?
O1B Co1 O1C 87.93(8) . . ?
O1A Co1 O1C 85.95(8) . . ?
C2 N1 N2 106.5(2) . . ?
C2 N1 Fe1 135.78(19) . . ?
N2 N1 Fe1 117.69(16) . . ?
C4 N2 N1 110.4(2) . . ?
C4 N2 B1 131.1(2) . . ?
N1 N2 B1 118.3(2) . . ?
C2 C1 H1A 109.5 . . ?
C2 C1 H1B 109.5 . . ?
H1A C1 H1B 109.5 . . ?
C2 C1 H1C 109.5 . . ?
H1A C1 H1C 109.5 . . ?
H1B C1 H1C 109.5 . . ?
N1 C2 C3 109.2(2) . . ?
N1 C2 C1 124.9(3) . . ?
C3 C2 C1 125.9(3) . . ?
C4 C3 C2 106.8(3) . . ?
C4 C3 H3 126.6 . . ?
C2 C3 H3 126.6 . . ?
N2 C4 C3 107.1(2) . . ?
N2 C4 C5 122.9(3) . . ?
C3 C4 C5 130.1(3) . . ?
C4 C5 H5A 109.5 . . ?
C4 C5 H5B 109.5 . . ?
H5A C5 H5B 109.5 . . ?
C4 C5 H5C 109.5 . . ?
H5A C5 H5C 109.5 . . ?
H5B C5 H5C 109.5 . . ?
C7 N3 N4 106.3(2) . . ?
C7 N3 Fe1 136.2(2) . . ?
N4 N3 Fe1 117.31(16) . . ?
C9 N4 N3 110.1(2) . . ?
C9 N4 B1 131.4(2) . . ?
N3 N4 B1 118.4(2) . . ?
C7 C6 H6A 109.5 . . ?
C7 C6 H6B 109.5 . . ?
H6A C6 H6B 109.5 . . ?
C7 C6 H6C 109.5 . . ?
H6A C6 H6C 109.5 . . ?
H6B C6 H6C 109.5 . . ?
N3 C7 C8 109.1(3) . . ?
N3 C7 C6 123.2(3) . . ?
C8 C7 C6 127.7(3) . . ?
C9 C8 C7 107.1(3) . . ?
C9 C8 H8 126.4 . . ?
C7 C8 H8 126.5 . . ?
N4 C9 C8 107.4(3) . . ?
N4 C9 C10 122.5(3) . . ?
C8 C9 C10 130.1(3) . . ?
C9 C10 H10A 109.5 . . ?
C9 C10 H10B 109.5 . . ?
H10A C10 H10B 109.5 . . ?
C9 C10 H10C 109.5 . . ?
H10A C10 H10C 109.5 . . ?
H10B C10 H10C 109.5 . . ?
C12 N5 N6 107.2(2) . . ?
C12 N5 Fe1 135.4(2) . . ?
N6 N5 Fe1 117.10(17) . . ?
C14 N6 N5 109.7(2) . . ?
C14 N6 B1 131.2(2) . . ?
N5 N6 B1 119.0(2) . . ?
C12 C11 H11A 109.5 . . ?
C12 C11 H11B 109.5 . . ?
H11A C11 H11B 109.5 . . ?
C12 C11 H11C 109.5 . . ?
H11A C11 H11C 109.5 . . ?
H11B C11 H11C 109.5 . . ?
N5 C12 C13 108.6(3) . . ?
N5 C12 C11 124.9(3) . . ?
C13 C12 C11 126.5(3) . . ?
C14 C13 C12 107.3(3) . . ?
C14 C13 H13 126.4 . . ?
C12 C13 H13 126.4 . . ?
N6 C14 C13 107.3(3) . . ?
N6 C14 C15 122.5(3) . . ?
C13 C14 C15 130.2(3) . . ?
C14 C15 H15A 109.5 . . ?
C14 C15 H15B 109.5 . . ?
H15A C15 H15B 109.5 . . ?
C14 C15 H15C 109.5 . . ?
H15A C15 H15C 109.5 . . ?
H15B C15 H15C 109.5 . . ?
N7 C16 Fe1 178.6(3) . . ?
C16 N7 Co1 175.4(2) . 3_565 ?
N8 C17 Fe1 178.6(3) . . ?
N9 C18 Fe1 176.7(2) . . ?
C18 N9 Co1 176.4(2) . . ?
C1A O1A Co1 129.76(19) . . ?
O1A C1A N1A 123.2(3) . . ?
O1A C1A H1A1 118.4 . . ?
N1A C1A H1A1 118.4 . . ?
C1A N1A C3A 122.0(3) . . ?
C1A N1A C2A 120.6(2) . . ?
C3A N1A C2A 117.2(2) . . ?
N1A C2A H2A1 109.5 . . ?
N1A C2A H2A2 109.5 . . ?
H2A1 C2A H2A2 109.5 . . ?
N1A C2A H2A3 109.5 . . ?
H2A1 C2A H2A3 109.5 . . ?
H2A2 C2A H2A3 109.5 . . ?
N1A C3A H3A1 109.5 . . ?
N1A C3A H3A2 109.5 . . ?
H3A1 C3A H3A2 109.5 . . ?
N1A C3A H3A3 109.5 . . ?
H3A1 C3A H3A3 109.5 . . ?
H3A2 C3A H3A3 109.5 . . ?
C1B O1B Co1 124.39(19) . . ?
O1B C1B N1B 124.9(3) . . ?
O1B C1B H1B1 117.6 . . ?
N1B C1B H1B1 117.6 . . ?
C1B N1B C2B 120.6(3) . . ?
C1B N1B C3B 121.8(3) . . ?
C2B N1B C3B 117.6(3) . . ?
N1B C2B H2B1 109.5 . . ?
N1B C2B H2B2 109.5 . . ?
H2B1 C2B H2B2 109.5 . . ?
N1B C2B H2B3 109.5 . . ?
H2B1 C2B H2B3 109.5 . . ?
H2B2 C2B H2B3 109.5 . . ?
N1B C3B H3B1 109.5 . . ?
N1B C3B H3B2 109.5 . . ?
H3B1 C3B H3B2 109.5 . . ?
N1B C3B H3B3 109.5 . . ?
H3B1 C3B H3B3 109.5 . . ?
H3B2 C3B H3B3 109.5 . . ?
C1C O1C Co1 117.31(19) . . ?
O1C C1C N1C 124.7(3) . . ?
O1C C1C H1C1 117.7 . . ?
N1C C1C H1C1 117.7 . . ?
C1C N1C C2C 121.9(3) . . ?
C1C N1C C3C 120.8(3) . . ?
C2C N1C C3C 117.2(3) . . ?
N1C C2C H2C1 109.5 . . ?
N1C C2C H2C2 109.5 . . ?
H2C1 C2C H2C2 109.5 . . ?
N1C C2C H2C3 109.5 . . ?
H2C1 C2C H2C3 109.5 . . ?
H2C2 C2C H2C3 109.5 . . ?
N1C C3C H3C1 109.5 . . ?
N1C C3C H3C2 109.5 . . ?
H3C1 C3C H3C2 109.5 . . ?
N1C C3C H3C3 109.5 . . ?
H3C1 C3C H3C3 109.5 . . ?
H3C2 C3C H3C3 109.5 . . ?
C1D O1D Co1 124.97(18) . . ?
O1D C1D N1D 123.9(3) . . ?
O1D C1D H1D 118.0 . . ?
N1D C1D H1D 118.0 . . ?
C1D N1D C2D 121.3(2) . . ?
C1D N1D C3D 121.9(3) . . ?
C2D N1D C3D 116.8(2) . . ?
N1D C2D H2D1 109.5 . . ?
N1D C2D H2D2 109.5 . . ?
H2D1 C2D H2D2 109.5 . . ?
N1D C2D H2D3 109.5 . . ?
H2D1 C2D H2D3 109.5 . . ?
H2D2 C2D H2D3 109.5 . . ?
N1D C3D H3D1 109.5 . . ?
N1D C3D H3D2 109.5 . . ?
H3D1 C3D H3D2 109.5 . . ?
N1D C3D H3D3 109.5 . . ?
H3D1 C3D H3D3 109.5 . . ?
H3D2 C3D H3D3 109.5 . . ?
O3E S1E O2E 114.86(14) . . ?
O3E S1E O1E 115.13(15) . . ?
O2E S1E O1E 115.61(13) . . ?
O3E S1E C1E 103.58(15) . . ?
O2E S1E C1E 102.96(15) . . ?
O1E S1E C1E 102.02(14) . . ?
F1E C1E F3E 107.1(3) . . ?
F1E C1E F2E 107.5(3) . . ?
F3E C1E F2E 107.0(3) . . ?
F1E C1E S1E 111.7(2) . . ?
F3E C1E S1E 111.8(2) . . ?
F2E C1E S1E 111.4(2) . . ?
O1F C1F N1F 116.0(8) . . ?
O1F C1F H1F 122.0 . . ?
N1F C1F H1F 122.0 . . ?
C1F N1F C3F 122.9(8) . . ?
C1F N1F C2F 120.5(7) . . ?
C3F N1F C2F 116.3(8) . . ?
C1F' O1F' H1F' 109.3 . . ?
O1F' C1F' N1F' 128(2) . . ?
O1F' C1F' H1F' 116.2 . . ?
N1F' C1F' H1F' 116.1 . . ?
C1F' N1F' C3F' 122(2) . . ?
C1F' N1F' C2F' 114.2(19) . . ?
C3F' N1F' C2F' 108.0(17) . . ?
N1F' C2F' H2F4 109.5 . . ?
N1F' C2F' H2F5 109.5 . . ?
H2F4 C2F' H2F5 109.5 . . ?
N1F' C2F' H2F6 109.4 . . ?
H2F4 C2F' H2F6 109.5 . . ?
H2F5 C2F' H2F6 109.5 . . ?
N1F' C3F' H3F4 109.5 . . ?
N1F' C3F' H3F5 109.4 . . ?
H3F4 C3F' H3F5 109.5 . . ?
N1F' C3F' H3F6 109.6 . . ?
H3F4 C3F' H3F6 109.5 . . ?
H3F5 C3F' H3F6 109.5 . . ?

loop_
_geom_torsion_atom_site_label_1
_geom_torsion_atom_site_label_2
_geom_torsion_atom_site_label_3
_geom_torsion_atom_site_label_4
_geom_torsion
_geom_torsion_site_symmetry_1
_geom_torsion_site_symmetry_2
_geom_torsion_site_symmetry_3
_geom_torsion_site_symmetry_4
_geom_torsion_publ_flag
C18 Fe1 N1 C2 -20.1(15) . . . . ?
C16 Fe1 N1 C2 41.2(3) . . . . ?
C17 Fe1 N1 C2 -46.5(3) . . . . ?
N3 Fe1 N1 C2 132.9(3) . . . . ?
N5 Fe1 N1 C2 -138.0(3) . . . . ?
C18 Fe1 N1 N2 159.0(13) . . . . ?
C16 Fe1 N1 N2 -139.61(19) . . . . ?
C17 Fe1 N1 N2 132.66(19) . . . . ?
N3 Fe1 N1 N2 -47.96(18) . . . . ?
N5 Fe1 N1 N2 41.12(18) . . . . ?
C2 N1 N2 C4 0.0(3) . . . . ?
Fe1 N1 N2 C4 -179.41(17) . . . . ?
C2 N1 N2 B1 -175.4(2) . . . . ?
Fe1 N1 N2 B1 5.3(3) . . . . ?
N6 B1 N2 C4 124.8(3) . . . . ?
N4 B1 N2 C4 -118.3(3) . . . . ?
N6 B1 N2 N1 -61.0(3) . . . . ?
N4 B1 N2 N1 55.9(3) . . . . ?
N2 N1 C2 C3 -0.5(3) . . . . ?
Fe1 N1 C2 C3 178.7(2) . . . . ?
N2 N1 C2 C1 179.3(3) . . . . ?
Fe1 N1 C2 C1 -1.5(4) . . . . ?
N1 C2 C3 C4 0.8(3) . . . . ?
C1 C2 C3 C4 -178.9(3) . . . . ?
N1 N2 C4 C3 0.5(3) . . . . ?
B1 N2 C4 C3 175.1(3) . . . . ?
N1 N2 C4 C5 -179.8(2) . . . . ?
B1 N2 C4 C5 -5.2(4) . . . . ?
C2 C3 C4 N2 -0.8(3) . . . . ?
C2 C3 C4 C5 179.5(3) . . . . ?
C18 Fe1 N3 C7 44.6(3) . . . . ?
C16 Fe1 N3 C7 -40.8(3) . . . . ?
C17 Fe1 N3 C7 -112(4) . . . . ?
N5 Fe1 N3 C7 136.1(3) . . . . ?
N1 Fe1 N3 C7 -133.5(3) . . . . ?
C18 Fe1 N3 N4 -141.86(19) . . . . ?
C16 Fe1 N3 N4 132.78(19) . . . . ?
C17 Fe1 N3 N4 62(4) . . . . ?
N5 Fe1 N3 N4 -50.33(19) . . . . ?
N1 Fe1 N3 N4 40.10(19) . . . . ?
C7 N3 N4 C9 1.4(3) . . . . ?
Fe1 N3 N4 C9 -173.93(18) . . . . ?
C7 N3 N4 B1 -176.3(2) . . . . ?
Fe1 N3 N4 B1 8.4(3) . . . . ?
N6 B1 N4 C9 -124.2(3) . . . . ?
N2 B1 N4 C9 118.1(3) . . . . ?
N6 B1 N4 N3 53.0(3) . . . . ?
N2 B1 N4 N3 -64.8(3) . . . . ?
N4 N3 C7 C8 -1.3(3) . . . . ?
Fe1 N3 C7 C8 172.8(2) . . . . ?
N4 N3 C7 C6 179.8(3) . . . . ?
Fe1 N3 C7 C6 -6.2(5) . . . . ?
N3 C7 C8 C9 0.6(3) . . . . ?
C6 C7 C8 C9 179.6(3) . . . . ?
N3 N4 C9 C8 -1.1(3) . . . . ?
B1 N4 C9 C8 176.2(3) . . . . ?
N3 N4 C9 C10 177.2(3) . . . . ?
B1 N4 C9 C10 -5.5(5) . . . . ?
C7 C8 C9 N4 0.3(3) . . . . ?
C7 C8 C9 C10 -177.8(3) . . . . ?
C18 Fe1 N5 C12 -34.5(3) . . . . ?
C16 Fe1 N5 C12 -25(2) . . . . ?
C17 Fe1 N5 C12 52.8(3) . . . . ?
N3 Fe1 N5 C12 -128.8(3) . . . . ?
N1 Fe1 N5 C12 141.7(3) . . . . ?
C18 Fe1 N5 N6 137.74(19) . . . . ?
C16 Fe1 N5 N6 147.2(19) . . . . ?
C17 Fe1 N5 N6 -134.96(19) . . . . ?
N3 Fe1 N5 N6 43.47(18) . . . . ?
N1 Fe1 N5 N6 -46.07(18) . . . . ?
C12 N5 N6 C14 0.8(3) . . . . ?
Fe1 N5 N6 C14 -173.49(17) . . . . ?
C12 N5 N6 B1 178.9(2) . . . . ?
Fe1 N5 N6 B1 4.6(3) . . . . ?
N2 B1 N6 C14 -127.1(3) . . . . ?
N4 B1 N6 C14 116.6(3) . . . . ?
N2 B1 N6 N5 55.3(3) . . . . ?
N4 B1 N6 N5 -60.9(3) . . . . ?
N6 N5 C12 C13 0.0(3) . . . . ?
Fe1 N5 C12 C13 172.7(2) . . . . ?
N6 N5 C12 C11 -178.8(2) . . . . ?
Fe1 N5 C12 C11 -6.1(4) . . . . ?
N5 C12 C13 C14 -0.7(3) . . . . ?
C11 C12 C13 C14 178.1(3) . . . . ?
N5 N6 C14 C13 -1.2(3) . . . . ?
B1 N6 C14 C13 -179.0(3) . . . . ?
N5 N6 C14 C15 178.9(2) . . . . ?
B1 N6 C14 C15 1.2(4) . . . . ?
C12 C13 C14 N6 1.2(3) . . . . ?
C12 C13 C14 C15 -179.0(3) . . . . ?
C18 Fe1 C16 N7 37(10) . . . . ?
C17 Fe1 C16 N7 -50(10) . . . . ?
N3 Fe1 C16 N7 132(10) . . . . ?
N5 Fe1 C16 N7 28(11) . . . . ?
N1 Fe1 C16 N7 -139(10) . . . . ?
Fe1 C16 N7 Co1 132(9) . . . 3_565 ?
C18 Fe1 C17 N8 -131(11) . . . . ?
C16 Fe1 C17 N8 -45(11) . . . . ?
N3 Fe1 C17 N8 26(14) . . . . ?
N5 Fe1 C17 N8 138(11) . . . . ?
N1 Fe1 C17 N8 48(11) . . . . ?
C16 Fe1 C18 N9 -75(4) . . . . ?
C17 Fe1 C18 N9 13(4) . . . . ?
N3 Fe1 C18 N9 -167(4) . . . . ?
N5 Fe1 C18 N9 104(4) . . . . ?
N1 Fe1 C18 N9 -14(5) . . . . ?
Fe1 C18 N9 Co1 -17(8) . . . . ?
N7 Co1 N9 C18 91(4) 3_565 . . . ?
O1D Co1 N9 C18 -176(4) . . . . ?
O1B Co1 N9 C18 -137(100) . . . . ?
O1A Co1 N9 C18 -2(4) . . . . ?
O1C Co1 N9 C18 -87(4) . . . . ?
N7 Co1 O1A C1A -83.2(2) 3_565 . . . ?
N9 Co1 O1A C1A 9.1(2) . . . . ?
O1D Co1 O1A C1A 114.5(7) . . . . ?
O1B Co1 O1A C1A -170.9(2) . . . . ?
O1C Co1 O1A C1A 101.0(2) . . . . ?
Co1 O1A C1A N1A -159.2(2) . . . . ?
O1A C1A N1A C3A 178.6(3) . . . . ?
O1A C1A N1A C2A 3.8(4) . . . . ?
N7 Co1 O1B C1B 129.1(2) 3_565 . . . ?
N9 Co1 O1B C1B -2(100) . . . . ?
O1D Co1 O1B C1B 35.8(2) . . . . ?
O1A Co1 O1B C1B -138.3(2) . . . . ?
O1C Co1 O1B C1B -52.3(2) . . . . ?
Co1 O1B C1B N1B -168.0(2) . . . . ?
O1B C1B N1B C2B 1.3(5) . . . . ?
O1B C1B N1B C3B -175.3(3) . . . . ?
N7 Co1 O1C C1C -41.0(12) 3_565 . . . ?
N9 Co1 O1C C1C 121.1(2) . . . . ?
O1D Co1 O1C C1C -148.9(2) . . . . ?
O1B Co1 O1C C1C -58.9(2) . . . . ?
O1A Co1 O1C C1C 29.7(2) . . . . ?
Co1 O1C C1C N1C -165.0(2) . . . . ?
O1C C1C N1C C2C -3.9(5) . . . . ?
O1C C1C N1C C3C -179.7(3) . . . . ?
N7 Co1 O1D C1D 18.2(2) 3_565 . . . ?
N9 Co1 O1D C1D -74.0(2) . . . . ?
O1B Co1 O1D C1D 106.0(2) . . . . ?
O1A Co1 O1D C1D -180(48) . . . . ?
O1C Co1 O1D C1D -166.1(2) . . . . ?
Co1 O1D C1D N1D 166.4(2) . . . . ?
O1D C1D N1D C2D -0.8(4) . . . . ?
O1D C1D N1D C3D 178.0(3) . . . . ?
O3E S1E C1E F1E 179.9(2) . . . . ?
O2E S1E C1E F1E 59.9(3) . . . . ?
O1E S1E C1E F1E -60.2(3) . . . . ?
O3E S1E C1E F3E -60.1(3) . . . . ?
O2E S1E C1E F3E 180.0(2) . . . . ?
O1E S1E C1E F3E 59.8(3) . . . . ?
O3E S1E C1E F2E 59.6(3) . . . . ?
O2E S1E C1E F2E -60.3(3) . . . . ?
O1E S1E C1E F2E 179.5(2) . . . . ?
O1F C1F N1F C3F 177.4(11) . . . . ?
O1F C1F N1F C2F 4.8(18) . . . . ?
O1F' C1F' N1F' C3F' -164(2) . . . . ?
O1F' C1F' N1F' C2F' -31(5) . . . . ?

_diffrn_measured_fraction_theta_max 1.000
_diffrn_reflns_theta_full        27.46
_diffrn_measured_fraction_theta_full 1.000
_refine_diff_density_max         .738
_refine_diff_density_min         -.498
_refine_diff_density_rms         .083

#======END

#((Tp*FeIII(CN)3-MII(DMF)4)2-(OTf)2).2DMF

data_k03214
_database_code_depnum_ccdc_archive 'CCDC 256541'

_audit_creation_method           SHELXL-97
_chemical_name_systematic        
;
?
;
_chemical_name_common            ?
_chemical_melting_point          ?
_chemical_formula_moiety         ((Tp*FeIII(CN)3-MII(DMF)4)2-(OTf)2).2DMF
_chemical_formula_sum            'C34 H63 B F3 Fe N14 Ni O8 S'
_chemical_formula_weight         1010.41

loop_
_atom_type_symbol
_atom_type_description
_atom_type_scat_dispersion_real
_atom_type_scat_dispersion_imag
_atom_type_scat_source
C C 0.0033 0.0016 'International Tables Vol C Tables 4.2.6.8 and 6.1.1.4'
H H 0.0000 0.0000 'International Tables Vol C Tables 4.2.6.8 and 6.1.1.4'
N N 0.0061 0.0033 'International Tables Vol C Tables 4.2.6.8 and 6.1.1.4'
Fe Fe 0.3463 0.8444 'International Tables Vol C Tables 4.2.6.8 and 6.1.1.4'
Ni Ni 0.3393 1.1124 'International Tables Vol C Tables 4.2.6.8 and 6.1.1.4'
S S 0.1246 0.1234 'International Tables Vol C Tables 4.2.6.8 and 6.1.1.4'
B B 0.0013 0.0007 'International Tables Vol C Tables 4.2.6.8 and 6.1.1.4'
F F 0.0171 0.0103 'International Tables Vol C Tables 4.2.6.8 and 6.1.1.4'
O O 0.0106 0.0060 'International Tables Vol C Tables 4.2.6.8 and 6.1.1.4'

_symmetry_cell_setting           monoclinic
_symmetry_space_group_name_H-M   'P 21/n'

loop_
_symmetry_equiv_pos_as_xyz
'x, y, z'
'-x+1/2, y+1/2, -z+1/2'
'-x, -y, -z'
'x-1/2, -y-1/2, z-1/2'

_cell_length_a                   15.3227(2)
_cell_length_b                   13.13430(10)
_cell_length_c                   24.0570(3)
_cell_angle_alpha                90.00
_cell_angle_beta                 108.1414(5)
_cell_angle_gamma                90.00
_cell_volume                     4600.87(9)
_cell_formula_units_Z            4
_cell_measurement_temperature    90.0(2)
_cell_measurement_reflns_used    8824
_cell_measurement_theta_min      1.00
_cell_measurement_theta_max      25.35

_exptl_crystal_description       'irregular block'
_exptl_crystal_colour            orange-red
_exptl_crystal_size_max          0.20
_exptl_crystal_size_mid          0.12
_exptl_crystal_size_min          0.10
_exptl_crystal_density_meas      ?
_exptl_crystal_density_diffrn    1.459
_exptl_crystal_density_method    'not measured'
_exptl_crystal_F_000             2124
_exptl_absorpt_coefficient_mu    0.845
_exptl_absorpt_correction_type   multi-scan
_exptl_absorpt_correction_T_min  0.8492
_exptl_absorpt_correction_T_max  0.9203
_exptl_absorpt_process_details   'Scalepack (Otwinowski & Minor, 1997)'

_exptl_special_details           
;
?
;

_diffrn_ambient_temperature      90.0(2)
_diffrn_radiation_wavelength     0.71073
_diffrn_radiation_type           MoK\a
_diffrn_radiation_source         'fine-focus sealed tube'
_diffrn_radiation_monochromator  graphite
_diffrn_measurement_device_type  'Nonius KappaCCD diffractometer'
_diffrn_measurement_method       '\w scans at fixed \c == 55\%'
_diffrn_detector_area_resol_mean 18
_diffrn_standards_number         ?
_diffrn_standards_interval_count ?
_diffrn_standards_interval_time  ?
_diffrn_standards_decay_%        ?
_diffrn_reflns_number            15732
_diffrn_reflns_av_R_equivalents  0.0398
_diffrn_reflns_av_sigmaI/netI    0.0549
_diffrn_reflns_limit_h_min       -18
_diffrn_reflns_limit_h_max       18
_diffrn_reflns_limit_k_min       -15
_diffrn_reflns_limit_k_max       15
_diffrn_reflns_limit_l_min       -28
_diffrn_reflns_limit_l_max       28
_diffrn_reflns_theta_min         1.40
_diffrn_reflns_theta_max         25.00
_reflns_number_total             8113
_reflns_number_gt                5753
_reflns_threshold_expression     >2\s(I)

_computing_data_collection       'COLLECT (Nonius, 1998)'
_computing_cell_refinement       'SCALEPACK (Otwinowski & Minor, 1997)'
_computing_data_reduction        'DENZO-SMN (Otwinowski & Minor, 1997)'
_computing_structure_solution    'SHELXS-97 (Sheldrick, 1990)'
_computing_structure_refinement  'SHELXL-97 (Sheldrick, 1997)'
_computing_molecular_graphics    'XP in SHELXTL (Sheldrick, 1995)'
_computing_publication_material  
;
SHELX97-2 (Sheldrick, 1997) and local procedures
;

_refine_special_details          
;
Refinement of F^2^ against ALL reflections.  The weighted R-factor wR and
goodness of fit S are based on F^2^, conventional R-factors R are based
on F, with F set to zero for negative F^2^. The threshold expression of
F^2^ > 2sigma(F^2^) is used only for calculating R-factors(gt) etc. and is
not relevant to the choice of reflections for refinement.  R-factors based
on F^2^ are statistically about twice as large as those based on F, and R-
factors based on ALL data will be even larger.
;

_refine_ls_structure_factor_coef Fsqd
_refine_ls_matrix_type           full
_refine_ls_weighting_scheme      calc
_refine_ls_weighting_details     
'calc w==1/[\s^2^(Fo^2^)+(0.1238P)^2^+2.4353P] where P==(Fo^2^+2Fc^2^)/3'
_atom_sites_solution_primary     direct
_atom_sites_solution_secondary   difmap
_atom_sites_solution_hydrogens   geom
_refine_ls_hydrogen_treatment    mixed
_refine_ls_extinction_method     none
_refine_ls_extinction_coef       ?
_refine_ls_number_reflns         8113
_refine_ls_number_parameters     630
_refine_ls_number_restraints     316
_refine_ls_R_factor_all          0.0934
_refine_ls_R_factor_gt           0.0636
_refine_ls_wR_factor_ref         0.1932
_refine_ls_wR_factor_gt          0.1740
_refine_ls_goodness_of_fit_ref   1.480
_refine_ls_restrained_S_all      1.501
_refine_ls_shift/su_max          2.123
_refine_ls_shift/su_mean         0.064

loop_
_atom_site_label
_atom_site_type_symbol
_atom_site_fract_x
_atom_site_fract_y
_atom_site_fract_z
_atom_site_U_iso_or_equiv
_atom_site_adp_type
_atom_site_occupancy
_atom_site_symmetry_multiplicity
_atom_site_calc_flag
_atom_site_refinement_flags
_atom_site_disorder_assembly
_atom_site_disorder_group
Fe1 Fe -0.11677(4) 0.21573(5) 0.40491(3) 0.0206(2) Uani 1 1 d . . .
B1 B -0.1872(3) 0.4354(4) 0.3877(2) 0.0266(12) Uani 1 1 d . . .
H1 H -0.2105 0.5071 0.3825 0.032 Uiso 1 1 calc R . .
N1 N -0.2472(2) 0.2570(3) 0.36818(15) 0.0217(8) Uani 1 1 d . . .
N2 N -0.2663(2) 0.3600(3) 0.36620(15) 0.0249(8) Uani 1 1 d . . .
C1 C -0.3391(3) 0.0951(3) 0.3446(2) 0.0297(11) Uani 1 1 d . . .
H1A H -0.2947 0.0664 0.3271 0.045 Uiso 1 1 calc R . .
H1B H -0.4015 0.0773 0.3204 0.045 Uiso 1 1 calc R . .
H1C H -0.3277 0.0675 0.3840 0.045 Uiso 1 1 calc R . .
C2 C -0.3292(3) 0.2083(3) 0.34782(19) 0.0248(10) Uani 1 1 d . . .
C3 C -0.3987(3) 0.2795(3) 0.33360(19) 0.0269(11) Uani 1 1 d . . .
H3 H -0.4626 0.2659 0.3181 0.032 Uiso 1 1 calc R . .
C4 C -0.3584(3) 0.3736(4) 0.34601(19) 0.0281(11) Uani 1 1 d . . .
C5 C -0.4010(3) 0.4780(4) 0.3398(2) 0.0377(12) Uani 1 1 d . . .
H5A H -0.3726 0.5175 0.3754 0.057 Uiso 1 1 calc R . .
H5B H -0.4671 0.4717 0.3336 0.057 Uiso 1 1 calc R . .
H5C H -0.3911 0.5128 0.3062 0.057 Uiso 1 1 calc R . .
N3 N -0.1068(2) 0.3158(3) 0.46858(15) 0.0229(8) Uani 1 1 d . . .
N4 N -0.1368(2) 0.4129(3) 0.45283(15) 0.0244(9) Uani 1 1 d . . .
C6 C -0.0307(4) 0.2234(4) 0.56244(19) 0.0369(13) Uani 1 1 d . . .
H6A H -0.0741 0.1667 0.5509 0.055 Uiso 1 1 calc R . .
H6B H -0.0183 0.2377 0.6042 0.055 Uiso 1 1 calc R . .
H6C H 0.0268 0.2053 0.5551 0.055 Uiso 1 1 calc R . .
C7 C -0.0708(3) 0.3156(4) 0.52773(19) 0.0310(11) Uani 1 1 d . . .
C8 C -0.0765(4) 0.4127(4) 0.5482(2) 0.0367(13) Uani 1 1 d . . .
H8 H -0.0561 0.4342 0.5879 0.044 Uiso 1 1 calc R . .
C9 C -0.1175(3) 0.4724(4) 0.5003(2) 0.0303(11) Uani 1 1 d . . .
C10 C -0.1369(4) 0.5853(4) 0.4964(2) 0.0459(14) Uani 1 1 d . . .
H10A H -0.1161 0.6151 0.4654 0.069 Uiso 1 1 calc R . .
H10B H -0.1041 0.6176 0.5339 0.069 Uiso 1 1 calc R . .
H10C H -0.2031 0.5967 0.4876 0.069 Uiso 1 1 calc R . .
N5 N -0.0766(2) 0.3240(3) 0.35907(15) 0.0230(8) Uani 1 1 d . . .
N6 N -0.1183(2) 0.4175(3) 0.35405(15) 0.0225(8) Uani 1 1 d . . .
C11 C 0.0461(3) 0.2458(4) 0.3235(2) 0.0339(12) Uani 1 1 d . . .
H11A H 0.0886 0.2292 0.3622 0.051 Uiso 1 1 calc R . .
H11B H 0.0812 0.2668 0.2976 0.051 Uiso 1 1 calc R . .
H11C H 0.0092 0.1857 0.3071 0.051 Uiso 1 1 calc R . .
C12 C -0.0154(3) 0.3302(4) 0.32893(18) 0.0246(10) Uani 1 1 d . . .
C13 C -0.0191(3) 0.4272(4) 0.30522(19) 0.0267(10) Uani 1 1 d . . .
H13 H 0.0164 0.4521 0.2821 0.032 Uiso 1 1 calc R . .
C14 C -0.0840(3) 0.4798(4) 0.32178(18) 0.0274(11) Uani 1 1 d . . .
C15 C -0.1160(3) 0.5885(3) 0.3092(2) 0.0323(11) Uani 1 1 d . . .
H15A H -0.1781 0.5893 0.2813 0.048 Uiso 1 1 calc R . .
H15B H -0.0742 0.6250 0.2925 0.048 Uiso 1 1 calc R . .
H15C H -0.1163 0.6217 0.3456 0.048 Uiso 1 1 calc R . .
C16 C -0.1521(3) 0.1047(3) 0.44522(18) 0.0224(10) Uani 1 1 d . . .
N7 N -0.1729(2) 0.0350(3) 0.46798(15) 0.0235(8) Uani 1 1 d . . .
C17 C -0.1239(3) 0.1207(4) 0.3426(2) 0.0247(10) Uani 1 1 d . . .
N8 N -0.1267(3) 0.0654(3) 0.30474(17) 0.0334(10) Uani 1 1 d . . .
C18 C 0.0071(3) 0.1692(3) 0.44165(18) 0.0216(10) Uani 1 1 d . . .
N9 N 0.0801(3) 0.1406(3) 0.46298(15) 0.0239(8) Uani 1 1 d . . .
Ni1 Ni 0.21193(4) 0.09197(4) 0.49710(2) 0.02291(19) Uani 1 1 d . . .
O1A O 0.2311(2) 0.1741(2) 0.57362(13) 0.0336(8) Uani 1 1 d D . .
C1A C 0.2118(3) 0.1506(4) 0.61887(19) 0.0304(11) Uani 1 1 d D . .
H1A1 H 0.2236 0.0767 0.6246 0.036 Uiso 1 1 calc R . .
H1A2 H 0.1447 0.1598 0.6095 0.036 Uiso 1 1 calc R . .
N1A N 0.2495(3) 0.1937(3) 0.67036(15) 0.0289(9) Uani 1 1 d D . .
C2A C 0.2269(4) 0.1624(4) 0.72166(19) 0.0352(12) Uani 1 1 d D . .
H2A1 H 0.1810 0.1079 0.7112 0.053 Uiso 1 1 calc R . .
H2A2 H 0.2019 0.2206 0.7373 0.053 Uiso 1 1 calc R . .
H2A3 H 0.2823 0.1376 0.7513 0.053 Uiso 1 1 calc R . .
C3A C 0.3209(4) 0.2690(4) 0.6781(2) 0.0409(13) Uani 1 1 d D . .
H3A1 H 0.3811 0.2360 0.6929 0.061 Uiso 1 1 calc R . .
H3A2 H 0.3150 0.3205 0.7062 0.061 Uiso 1 1 calc R . .
H3A3 H 0.3151 0.3016 0.6405 0.061 Uiso 1 1 calc R . .
O1B O 0.2513(2) 0.2219(2) 0.46304(14) 0.0350(8) Uani 1 1 d D . .
C1B C 0.2978(4) 0.2238(4) 0.4306(2) 0.0419(13) Uani 1 1 d D . .
H1B1 H 0.2719 0.1706 0.4009 0.050 Uiso 1 1 calc R . .
H1B2 H 0.3591 0.1989 0.4542 0.050 Uiso 1 1 calc R . .
N1B N 0.3136(3) 0.3023(3) 0.4013(2) 0.0459(12) Uani 1 1 d D . .
C2B C 0.2656(6) 0.3951(5) 0.3999(5) 0.112(4) Uani 1 1 d D . .
H2B1 H 0.2066 0.3812 0.4062 0.168 Uiso 1 1 calc R . .
H2B2 H 0.2548 0.4278 0.3617 0.168 Uiso 1 1 calc R . .
H2B3 H 0.3022 0.4404 0.4308 0.168 Uiso 1 1 calc R . .
C3B C 0.3789(7) 0.3004(6) 0.3694(4) 0.113(4) Uani 1 1 d D . .
H3B1 H 0.4080 0.2332 0.3734 0.169 Uiso 1 1 calc R . .
H3B2 H 0.4259 0.3525 0.3850 0.169 Uiso 1 1 calc R . .
H3B3 H 0.3472 0.3142 0.3279 0.169 Uiso 1 1 calc R . .
O1C O 0.3497(2) 0.0522(3) 0.53123(15) 0.0394(9) Uani 1 1 d D . .
C1C C 0.4026(3) 0.1165(5) 0.5655(2) 0.0464(14) Uani 1 1 d D . .
H1C1 H 0.3681 0.1430 0.5910 0.056 Uiso 1 1 calc R . .
H1C2 H 0.4092 0.1741 0.5405 0.056 Uiso 1 1 calc R . .
N1C N 0.4861(3) 0.0957(4) 0.6002(2) 0.0563(14) Uani 1 1 d D . .
C2C C 0.5415(4) 0.1734(5) 0.6382(3) 0.070(2) Uani 1 1 d D . .
H2C1 H 0.5952 0.1888 0.6258 0.106 Uiso 1 1 calc R . .
H2C2 H 0.5619 0.1484 0.6786 0.106 Uiso 1 1 calc R . .
H2C3 H 0.5047 0.2352 0.6359 0.106 Uiso 1 1 calc R . .
C3C C 0.5288(5) -0.0014(5) 0.5970(3) 0.075(2) Uani 1 1 d D . .
H3C1 H 0.4846 -0.0459 0.5694 0.113 Uiso 1 1 calc R . .
H3C2 H 0.5483 -0.0332 0.6358 0.113 Uiso 1 1 calc R . .
H3C3 H 0.5824 0.0090 0.5837 0.113 Uiso 1 1 calc R . .
O1D O 0.2095(2) 0.0123(2) 0.42323(13) 0.0274(7) Uani 1 1 d D . .
C1D C 0.1386(3) -0.0168(3) 0.3846(2) 0.0296(11) Uani 1 1 d D . .
H1D1 H 0.1082 0.0454 0.3644 0.036 Uiso 1 1 calc R . .
H1D2 H 0.0976 -0.0452 0.4054 0.036 Uiso 1 1 calc R . .
N1D N 0.1381(3) -0.0823(3) 0.34341(16) 0.0318(10) Uani 1 1 d D . .
C2D C 0.2246(4) -0.1304(5) 0.3425(3) 0.0495(15) Uani 1 1 d D . .
H2D1 H 0.2736 -0.1135 0.3786 0.074 Uiso 1 1 calc R . .
H2D2 H 0.2412 -0.1052 0.3087 0.074 Uiso 1 1 calc R . .
H2D3 H 0.2166 -0.2044 0.3395 0.074 Uiso 1 1 calc R . .
C3D C 0.0552(4) -0.1105(4) 0.2982(2) 0.0451(14) Uani 1 1 d D . .
H3D1 H 0.0023 -0.0782 0.3058 0.068 Uiso 1 1 calc R . .
H3D2 H 0.0479 -0.1846 0.2978 0.068 Uiso 1 1 calc R . .
H3D3 H 0.0588 -0.0878 0.2602 0.068 Uiso 1 1 calc R . .
S1E S 0.32684(10) 0.08596(11) 0.22874(6) 0.0435(4) Uani 1 1 d . . .
O1E O 0.3009(3) 0.1092(3) 0.16781(17) 0.0648(13) Uani 1 1 d . . .
O2E O 0.3368(3) -0.0194(3) 0.24402(18) 0.0596(12) Uani 1 1 d . . .
O3E O 0.3987(3) 0.1490(3) 0.26329(19) 0.0665(12) Uani 1 1 d . . .
C1E C 0.2266(4) 0.1203(4) 0.2492(3) 0.0485(15) Uani 1 1 d . . .
F1E F 0.2383(3) 0.1050(3) 0.30568(16) 0.0655(10) Uani 1 1 d . . .
F2E F 0.2036(3) 0.2185(3) 0.23807(19) 0.0762(12) Uani 1 1 d . . .
F3E F 0.1514(3) 0.0668(3) 0.2197(2) 0.0871(13) Uani 1 1 d . . .
O1F O 0.5051(9) 0.1818(13) 0.4920(7) 0.155(5) Uani 0.581(7) 1 d PDU A 1
H1F H 0.4698 0.1949 0.4584 0.233 Uiso 0.581(7) 1 calc PR A 1
C1F C 0.5852(10) 0.2025(11) 0.4946(7) 0.105(4) Uani 0.581(7) 1 d PDU A 1
H1F1 H 0.5895 0.1962 0.4545 0.126 Uiso 0.581(7) 1 calc PR A 1
H1F2 H 0.6253 0.1491 0.5185 0.126 Uiso 0.581(7) 1 calc PR A 1
N1F N 0.6210(10) 0.2925(12) 0.5156(12) 0.087(3) Uani 0.581(7) 1 d PDU A 1
C2F C 0.5739(12) 0.3663(13) 0.5418(8) 0.115(5) Uani 0.581(7) 1 d PDU A 1
H2F1 H 0.6125 0.4269 0.5539 0.173 Uiso 0.581(7) 1 calc PR A 1
H2F2 H 0.5622 0.3358 0.5760 0.173 Uiso 0.581(7) 1 calc PR A 1
H2F3 H 0.5154 0.3857 0.5131 0.173 Uiso 0.581(7) 1 calc PR A 1
C3F C 0.7173(8) 0.3054(14) 0.5249(7) 0.105(4) Uani 0.581(7) 1 d PDU A 1
H3F1 H 0.7363 0.3731 0.5413 0.158 Uiso 0.581(7) 1 calc PR A 1
H3F2 H 0.7299 0.2985 0.4876 0.158 Uiso 0.581(7) 1 calc PR A 1
H3F3 H 0.7515 0.2533 0.5522 0.158 Uiso 0.581(7) 1 calc PR A 1
O1F' O 0.4780(13) 0.3283(16) 0.5239(11) 0.150(6) Uani 0.419(7) 1 d PDU A 2
H1F' H 0.4915 0.3649 0.5540 0.225 Uiso 0.419(7) 1 calc PR A 2
C1F' C 0.5467(14) 0.307(2) 0.5123(12) 0.131(5) Uani 0.419(7) 1 d PDU A 2
H1F3 H 0.5259 0.3328 0.4717 0.157 Uiso 0.419(7) 1 calc PR A 2
H1F4 H 0.5349 0.2329 0.5076 0.157 Uiso 0.419(7) 1 calc PR A 2
N1F' N 0.6322(16) 0.3028(17) 0.5174(19) 0.112(4) Uani 0.419(7) 1 d PDU A 2
C2F' C 0.6858(14) 0.2204(14) 0.5023(9) 0.091(5) Uani 0.419(7) 1 d PDU A 2
H2F4 H 0.7475 0.2452 0.5056 0.137 Uiso 0.419(7) 1 calc PR A 2
H2F5 H 0.6552 0.1979 0.4621 0.137 Uiso 0.419(7) 1 calc PR A 2
H2F6 H 0.6904 0.1630 0.5292 0.137 Uiso 0.419(7) 1 calc PR A 2
C3F' C 0.6660(19) 0.3966(17) 0.5005(12) 0.140(7) Uani 0.419(7) 1 d PDU A 2
H3F4 H 0.7262 0.3847 0.4953 0.210 Uiso 0.419(7) 1 calc PR A 2
H3F5 H 0.6720 0.4480 0.5310 0.210 Uiso 0.419(7) 1 calc PR A 2
H3F6 H 0.6229 0.4209 0.4636 0.210 Uiso 0.419(7) 1 calc PR A 2

loop_
_atom_site_aniso_label
_atom_site_aniso_U_11
_atom_site_aniso_U_22
_atom_site_aniso_U_33
_atom_site_aniso_U_23
_atom_site_aniso_U_13
_atom_site_aniso_U_12
Fe1 0.0225(4) 0.0181(4) 0.0186(3) 0.0015(2) 0.0025(3) -0.0006(2)
B1 0.023(3) 0.021(3) 0.030(3) -0.002(2) 0.001(2) -0.003(2)
N1 0.024(2) 0.019(2) 0.0203(19) 0.0017(15) 0.0041(15) -0.0036(16)
N2 0.030(2) 0.017(2) 0.026(2) 0.0020(16) 0.0059(16) -0.0010(16)
C1 0.027(3) 0.030(3) 0.026(2) 0.005(2) -0.001(2) -0.006(2)
C2 0.025(2) 0.024(3) 0.023(2) 0.0027(19) 0.0051(19) -0.003(2)
C3 0.017(2) 0.031(3) 0.029(3) 0.008(2) 0.0016(19) -0.0010(19)
C4 0.024(3) 0.029(3) 0.029(3) 0.007(2) 0.006(2) 0.001(2)
C5 0.026(3) 0.030(3) 0.054(3) 0.005(2) 0.009(2) 0.005(2)
N3 0.027(2) 0.019(2) 0.0216(19) -0.0009(16) 0.0056(16) -0.0018(16)
N4 0.026(2) 0.022(2) 0.023(2) -0.0015(16) 0.0044(16) 0.0009(16)
C6 0.044(3) 0.044(3) 0.015(2) -0.001(2) -0.001(2) -0.003(2)
C7 0.029(3) 0.038(3) 0.020(2) -0.002(2) 0.000(2) 0.002(2)
C8 0.044(3) 0.037(3) 0.024(3) -0.015(2) 0.003(2) -0.007(2)
C9 0.033(3) 0.026(3) 0.030(3) -0.007(2) 0.006(2) 0.000(2)
C10 0.061(4) 0.029(3) 0.044(3) -0.012(2) 0.012(3) 0.004(3)
N5 0.024(2) 0.020(2) 0.0216(19) 0.0028(16) 0.0013(16) 0.0004(16)
N6 0.025(2) 0.018(2) 0.0198(19) -0.0005(15) 0.0010(16) -0.0012(16)
C11 0.029(3) 0.039(3) 0.035(3) 0.009(2) 0.013(2) 0.009(2)
C12 0.023(2) 0.030(3) 0.019(2) 0.0031(19) 0.0040(19) -0.001(2)
C13 0.027(3) 0.027(3) 0.026(2) 0.002(2) 0.009(2) -0.005(2)
C14 0.032(3) 0.026(3) 0.018(2) -0.0002(19) -0.001(2) -0.010(2)
C15 0.039(3) 0.025(3) 0.029(3) 0.006(2) 0.005(2) -0.006(2)
C16 0.023(2) 0.022(3) 0.018(2) -0.0004(19) -0.0002(19) 0.0013(19)
N7 0.026(2) 0.019(2) 0.0216(19) 0.0021(16) 0.0023(16) 0.0012(16)
C17 0.024(2) 0.023(3) 0.025(2) 0.003(2) 0.0055(19) 0.0010(19)
N8 0.046(3) 0.027(2) 0.026(2) -0.0021(19) 0.0091(19) -0.0024(19)
C18 0.032(3) 0.015(2) 0.017(2) -0.0013(18) 0.006(2) -0.002(2)
N9 0.029(2) 0.020(2) 0.0187(19) 0.0010(16) 0.0005(17) -0.0008(17)
Ni1 0.0219(3) 0.0224(4) 0.0210(3) 0.0038(2) 0.0018(2) -0.0029(2)
O1A 0.042(2) 0.032(2) 0.0223(17) -0.0010(15) 0.0025(15) -0.0085(16)
C1A 0.029(3) 0.022(3) 0.033(3) 0.004(2) 0.000(2) 0.006(2)
N1A 0.035(2) 0.024(2) 0.022(2) -0.0022(16) -0.0004(17) -0.0016(17)
C2A 0.050(3) 0.022(3) 0.029(3) 0.000(2) 0.006(2) 0.006(2)
C3A 0.050(3) 0.037(3) 0.030(3) -0.008(2) 0.004(2) -0.008(3)
O1B 0.044(2) 0.030(2) 0.0341(19) 0.0005(15) 0.0160(17) -0.0074(15)
C1B 0.046(3) 0.034(3) 0.045(3) -0.004(3) 0.014(3) -0.006(2)
N1B 0.059(3) 0.035(3) 0.052(3) 0.014(2) 0.029(2) -0.003(2)
C2B 0.099(7) 0.060(5) 0.193(10) 0.057(6) 0.068(7) 0.005(5)
C3B 0.181(10) 0.079(6) 0.132(8) -0.017(5) 0.125(8) -0.038(6)
O1C 0.030(2) 0.044(2) 0.039(2) 0.0079(17) 0.0033(16) 0.0022(16)
C1C 0.031(3) 0.062(4) 0.043(3) 0.007(3) 0.008(3) -0.012(3)
N1C 0.040(3) 0.057(4) 0.060(3) 0.000(3) -0.001(2) 0.001(2)
C2C 0.043(4) 0.087(6) 0.070(5) -0.012(4) 0.003(3) -0.013(4)
C3C 0.066(5) 0.059(5) 0.098(6) 0.007(4) 0.022(4) 0.022(4)
O1D 0.0319(19) 0.0237(18) 0.0271(17) -0.0022(14) 0.0095(15) -0.0020(14)
C1D 0.043(3) 0.019(3) 0.032(3) 0.008(2) 0.019(2) 0.005(2)
N1D 0.038(2) 0.030(2) 0.031(2) -0.0061(18) 0.0150(19) -0.0032(18)
C2D 0.052(4) 0.044(4) 0.056(4) -0.014(3) 0.021(3) 0.003(3)
C3D 0.052(4) 0.043(3) 0.038(3) -0.011(3) 0.010(3) 0.000(3)
S1E 0.0484(9) 0.0405(9) 0.0464(8) 0.0033(6) 0.0216(7) 0.0066(6)
O1E 0.112(4) 0.051(3) 0.043(2) 0.008(2) 0.042(2) 0.006(2)
O2E 0.075(3) 0.045(3) 0.072(3) 0.016(2) 0.042(2) 0.015(2)
O3E 0.057(3) 0.064(3) 0.071(3) 0.000(2) 0.009(2) -0.019(2)
C1E 0.052(4) 0.030(3) 0.066(4) 0.015(3) 0.022(3) 0.004(3)
F1E 0.094(3) 0.053(2) 0.071(2) 0.0121(18) 0.057(2) 0.0122(19)
F2E 0.081(3) 0.055(2) 0.117(3) 0.035(2) 0.065(3) 0.032(2)
F3E 0.048(2) 0.086(3) 0.120(4) 0.021(3) 0.015(2) -0.015(2)
O1F 0.141(7) 0.167(9) 0.163(9) -0.010(7) 0.056(7) -0.035(7)
C1F 0.109(7) 0.116(7) 0.090(7) -0.005(6) 0.031(6) -0.021(6)
N1F 0.077(5) 0.109(6) 0.084(6) 0.001(5) 0.036(5) -0.003(5)
C2F 0.100(8) 0.115(8) 0.143(9) -0.012(7) 0.054(7) -0.012(7)
C3F 0.087(6) 0.125(9) 0.109(8) -0.009(7) 0.037(6) -0.015(6)
O1F' 0.127(8) 0.162(10) 0.170(10) 0.005(8) 0.060(8) 0.000(8)
C1F' 0.117(7) 0.147(9) 0.132(9) 0.004(7) 0.043(7) 0.018(7)
N1F' 0.107(7) 0.125(7) 0.105(7) -0.002(6) 0.037(6) 0.006(6)
C2F' 0.092(8) 0.106(8) 0.084(8) 0.002(7) 0.039(7) -0.007(7)
C3F' 0.140(10) 0.121(8) 0.147(11) -0.011(8) 0.029(8) -0.011(8)

_geom_special_details            
;
All esds (except the esd in the dihedral angle between two l.s. planes)
are estimated using the full covariance matrix.  The cell esds are taken
into account individually in the estimation of esds in distances, angles
and torsion angles; correlations between esds in cell parameters are only
used when they are defined by crystal symmetry.  An approximate (isotropic)
treatment of cell esds is used for estimating esds involving l.s. planes.
;

loop_
_geom_bond_atom_site_label_1
_geom_bond_atom_site_label_2
_geom_bond_distance
_geom_bond_site_symmetry_2
_geom_bond_publ_flag
Fe1 C16 1.920(5) . ?
Fe1 C17 1.928(5) . ?
Fe1 C18 1.927(5) . ?
Fe1 N3 1.988(4) . ?
Fe1 N1 1.992(4) . ?
Fe1 N5 2.010(4) . ?
B1 N2 1.526(6) . ?
B1 N6 1.537(7) . ?
B1 N4 1.544(6) . ?
B1 H1 1.0000 . ?
N1 C2 1.357(6) . ?
N1 N2 1.382(5) . ?
N2 C4 1.354(6) . ?
C1 C2 1.494(6) . ?
C1 H1A 0.9800 . ?
C1 H1B 0.9800 . ?
C1 H1C 0.9800 . ?
C2 C3 1.378(6) . ?
C3 C4 1.372(7) . ?
C3 H3 0.9500 . ?
C4 C5 1.506(7) . ?
C5 H5A 0.9800 . ?
C5 H5B 0.9800 . ?
C5 H5C 0.9800 . ?
N3 C7 1.357(5) . ?
N3 N4 1.369(5) . ?
N4 C9 1.338(6) . ?
C6 C7 1.490(7) . ?
C6 H6A 0.9800 . ?
C6 H6B 0.9800 . ?
C6 H6C 0.9800 . ?
C7 C8 1.381(7) . ?
C8 C9 1.374(7) . ?
C8 H8 0.9500 . ?
C9 C10 1.510(7) . ?
C10 H10A 0.9800 . ?
C10 H10B 0.9800 . ?
C10 H10C 0.9800 . ?
N5 C12 1.354(5) . ?
N5 N6 1.372(5) . ?
N6 C14 1.342(6) . ?
C11 C12 1.488(6) . ?
C11 H11A 0.9800 . ?
C11 H11B 0.9800 . ?
C11 H11C 0.9800 . ?
C12 C13 1.389(6) . ?
C13 C14 1.368(7) . ?
C13 H13 0.9500 . ?
C14 C15 1.509(7) . ?
C15 H15A 0.9800 . ?
C15 H15B 0.9800 . ?
C15 H15C 0.9800 . ?
C16 N7 1.161(6) . ?
N7 Ni1 2.039(4) 3_556 ?
C17 N8 1.155(6) . ?
C18 N9 1.139(6) . ?
N9 Ni1 2.032(4) . ?
Ni1 N7 2.039(4) 3_556 ?
Ni1 O1D 2.053(3) . ?
Ni1 O1B 2.063(3) . ?
Ni1 O1A 2.074(3) . ?
Ni1 O1C 2.079(3) . ?
O1A C1A 1.252(5) . ?
C1A N1A 1.320(5) . ?
C1A H1A1 0.9900 . ?
C1A H1A2 0.9900 . ?
N1A C2A 1.442(6) . ?
N1A C3A 1.443(6) . ?
C2A H2A1 0.9800 . ?
C2A H2A2 0.9800 . ?
C2A H2A3 0.9800 . ?
C3A H3A1 0.9800 . ?
C3A H3A2 0.9800 . ?
C3A H3A3 0.9800 . ?
O1B C1B 1.210(5) . ?
C1B N1B 1.313(6) . ?
C1B H1B1 0.9900 . ?
C1B H1B2 0.9900 . ?
N1B C2B 1.419(8) . ?
N1B C3B 1.438(7) . ?
C2B H2B1 0.9800 . ?
C2B H2B2 0.9800 . ?
C2B H2B3 0.9800 . ?
C3B H3B1 0.9800 . ?
C3B H3B2 0.9800 . ?
C3B H3B3 0.9800 . ?
O1C C1C 1.278(6) . ?
C1C N1C 1.321(6) . ?
C1C H1C1 0.9900 . ?
C1C H1C2 0.9900 . ?
N1C C3C 1.447(7) . ?
N1C C2C 1.454(7) . ?
C2C H2C1 0.9800 . ?
C2C H2C2 0.9800 . ?
C2C H2C3 0.9800 . ?
C3C H3C1 0.9800 . ?
C3C H3C2 0.9800 . ?
C3C H3C3 0.9800 . ?
O1D C1D 1.249(5) . ?
C1D N1D 1.309(5) . ?
C1D H1D1 0.9900 . ?
C1D H1D2 0.9900 . ?
N1D C3D 1.440(6) . ?
N1D C2D 1.476(6) . ?
C2D H2D1 0.9800 . ?
C2D H2D2 0.9800 . ?
C2D H2D3 0.9800 . ?
C3D H3D1 0.9800 . ?
C3D H3D2 0.9800 . ?
C3D H3D3 0.9800 . ?
S1E O3E 1.421(4) . ?
S1E O1E 1.427(4) . ?
S1E O2E 1.427(4) . ?
S1E C1E 1.810(6) . ?
C1E F1E 1.329(7) . ?
C1E F2E 1.342(6) . ?
C1E F3E 1.348(7) . ?
O1F C1F 1.240(12) . ?
O1F H1F 0.8401 . ?
C1F N1F 1.335(13) . ?
C1F H1F1 0.9900 . ?
C1F H1F2 0.9900 . ?
N1F C3F 1.432(13) . ?
N1F C2F 1.464(13) . ?
C2F H2F1 0.9800 . ?
C2F H2F2 0.9800 . ?
C2F H2F3 0.9800 . ?
C3F H3F1 0.9800 . ?
C3F H3F2 0.9800 . ?
C3F H3F3 0.9800 . ?
O1F' C1F' 1.202(14) . ?
O1F' H1F' 0.8678 . ?
C1F' N1F' 1.279(14) . ?
C1F' H1F3 0.9900 . ?
C1F' H1F4 0.9900 . ?
N1F' C3F' 1.444(16) . ?
N1F' C2F' 1.471(15) . ?
C2F' H2F4 0.9800 . ?
C2F' H2F5 0.9800 . ?
C2F' H2F6 0.9800 . ?
C3F' H3F4 0.9800 . ?
C3F' H3F5 0.9800 . ?
C3F' H3F6 0.9800 . ?

loop_
_geom_angle_atom_site_label_1
_geom_angle_atom_site_label_2
_geom_angle_atom_site_label_3
_geom_angle
_geom_angle_site_symmetry_1
_geom_angle_site_symmetry_3
_geom_angle_publ_flag
C16 Fe1 C17 86.84(18) . . ?
C16 Fe1 C18 85.41(18) . . ?
C17 Fe1 C18 87.72(18) . . ?
C16 Fe1 N3 94.51(16) . . ?
C17 Fe1 N3 178.44(17) . . ?
C18 Fe1 N3 91.61(16) . . ?
C16 Fe1 N1 91.64(16) . . ?
C17 Fe1 N1 91.45(17) . . ?
C18 Fe1 N1 176.98(16) . . ?
N3 Fe1 N1 89.29(15) . . ?
C16 Fe1 N5 175.63(17) . . ?
C17 Fe1 N5 89.08(17) . . ?
C18 Fe1 N5 92.86(16) . . ?
N3 Fe1 N5 89.54(15) . . ?
N1 Fe1 N5 90.04(14) . . ?
N2 B1 N6 109.0(4) . . ?
N2 B1 N4 108.3(4) . . ?
N6 B1 N4 107.2(4) . . ?
N2 B1 H1 110.7 . . ?
N6 B1 H1 110.7 . . ?
N4 B1 H1 110.7 . . ?
C2 N1 N2 106.6(3) . . ?
C2 N1 Fe1 136.0(3) . . ?
N2 N1 Fe1 117.0(3) . . ?
C4 N2 N1 109.1(3) . . ?
C4 N2 B1 131.7(4) . . ?
N1 N2 B1 119.1(4) . . ?
C2 C1 H1A 109.5 . . ?
C2 C1 H1B 109.4 . . ?
H1A C1 H1B 109.5 . . ?
C2 C1 H1C 109.5 . . ?
H1A C1 H1C 109.5 . . ?
H1B C1 H1C 109.5 . . ?
N1 C2 C3 109.1(4) . . ?
N1 C2 C1 123.7(4) . . ?
C3 C2 C1 127.1(4) . . ?
C4 C3 C2 107.2(4) . . ?
C4 C3 H3 126.4 . . ?
C2 C3 H3 126.4 . . ?
N2 C4 C3 107.9(4) . . ?
N2 C4 C5 121.8(4) . . ?
C3 C4 C5 130.3(4) . . ?
C4 C5 H5A 109.5 . . ?
C4 C5 H5B 109.5 . . ?
H5A C5 H5B 109.5 . . ?
C4 C5 H5C 109.5 . . ?
H5A C5 H5C 109.5 . . ?
H5B C5 H5C 109.5 . . ?
C7 N3 N4 106.5(4) . . ?
C7 N3 Fe1 135.7(3) . . ?
N4 N3 Fe1 117.7(3) . . ?
C9 N4 N3 110.0(3) . . ?
C9 N4 B1 131.4(4) . . ?
N3 N4 B1 118.6(3) . . ?
C7 C6 H6A 109.5 . . ?
C7 C6 H6B 109.5 . . ?
H6A C6 H6B 109.5 . . ?
C7 C6 H6C 109.5 . . ?
H6A C6 H6C 109.5 . . ?
H6B C6 H6C 109.5 . . ?
N3 C7 C8 108.8(4) . . ?
N3 C7 C6 123.5(4) . . ?
C8 C7 C6 127.7(4) . . ?
C9 C8 C7 106.9(4) . . ?
C9 C8 H8 126.5 . . ?
C7 C8 H8 126.6 . . ?
N4 C9 C8 107.8(4) . . ?
N4 C9 C10 122.3(4) . . ?
C8 C9 C10 129.9(4) . . ?
C9 C10 H10A 109.4 . . ?
C9 C10 H10B 109.5 . . ?
H10A C10 H10B 109.5 . . ?
C9 C10 H10C 109.5 . . ?
H10A C10 H10C 109.5 . . ?
H10B C10 H10C 109.5 . . ?
C12 N5 N6 106.2(3) . . ?
C12 N5 Fe1 135.9(3) . . ?
N6 N5 Fe1 117.9(3) . . ?
C14 N6 N5 109.9(4) . . ?
C14 N6 B1 132.0(4) . . ?
N5 N6 B1 117.9(4) . . ?
C12 C11 H11A 109.4 . . ?
C12 C11 H11B 109.5 . . ?
H11A C11 H11B 109.5 . . ?
C12 C11 H11C 109.5 . . ?
H11A C11 H11C 109.5 . . ?
H11B C11 H11C 109.5 . . ?
N5 C12 C13 109.2(4) . . ?
N5 C12 C11 124.4(4) . . ?
C13 C12 C11 126.4(4) . . ?
C14 C13 C12 106.5(4) . . ?
C14 C13 H13 126.8 . . ?
C12 C13 H13 126.8 . . ?
N6 C14 C13 108.1(4) . . ?
N6 C14 C15 122.1(4) . . ?
C13 C14 C15 129.7(4) . . ?
C14 C15 H15A 109.5 . . ?
C14 C15 H15B 109.5 . . ?
H15A C15 H15B 109.5 . . ?
C14 C15 H15C 109.5 . . ?
H15A C15 H15C 109.5 . . ?
H15B C15 H15C 109.5 . . ?
N7 C16 Fe1 177.3(4) . . ?
C16 N7 Ni1 176.4(3) . 3_556 ?
N8 C17 Fe1 178.3(4) . . ?
N9 C18 Fe1 179.1(4) . . ?
C18 N9 Ni1 176.9(4) . . ?
N9 Ni1 N7 92.34(14) . 3_556 ?
N9 Ni1 O1D 93.58(13) . . ?
N7 Ni1 O1D 90.64(13) 3_556 . ?
N9 Ni1 O1B 87.53(14) . . ?
N7 Ni1 O1B 178.97(14) 3_556 . ?
O1D Ni1 O1B 90.39(12) . . ?
N9 Ni1 O1A 92.47(14) . . ?
N7 Ni1 O1A 92.19(13) 3_556 . ?
O1D Ni1 O1A 173.21(13) . . ?
O1B Ni1 O1A 86.80(13) . . ?
N9 Ni1 O1C 176.12(14) . . ?
N7 Ni1 O1C 91.37(14) 3_556 . ?
O1D Ni1 O1C 87.51(13) . . ?
O1B Ni1 O1C 88.75(14) . . ?
O1A Ni1 O1C 86.25(14) . . ?
C1A O1A Ni1 129.6(3) . . ?
O1A C1A N1A 123.9(4) . . ?
O1A C1A H1A1 106.4 . . ?
N1A C1A H1A1 106.4 . . ?
O1A C1A H1A2 106.3 . . ?
N1A C1A H1A2 106.3 . . ?
H1A1 C1A H1A2 106.4 . . ?
C1A N1A C2A 122.0(4) . . ?
C1A N1A C3A 120.5(4) . . ?
C2A N1A C3A 117.4(4) . . ?
N1A C2A H2A1 109.5 . . ?
N1A C2A H2A2 109.5 . . ?
H2A1 C2A H2A2 109.5 . . ?
N1A C2A H2A3 109.5 . . ?
H2A1 C2A H2A3 109.5 . . ?
H2A2 C2A H2A3 109.5 . . ?
N1A C3A H3A1 109.5 . . ?
N1A C3A H3A2 109.5 . . ?
H3A1 C3A H3A2 109.5 . . ?
N1A C3A H3A3 109.5 . . ?
H3A1 C3A H3A3 109.5 . . ?
H3A2 C3A H3A3 109.5 . . ?
C1B O1B Ni1 125.3(3) . . ?
O1B C1B N1B 127.3(5) . . ?
O1B C1B H1B1 105.5 . . ?
N1B C1B H1B1 105.5 . . ?
O1B C1B H1B2 105.5 . . ?
N1B C1B H1B2 105.5 . . ?
H1B1 C1B H1B2 106.0 . . ?
C1B N1B C2B 120.4(5) . . ?
C1B N1B C3B 123.2(5) . . ?
C2B N1B C3B 116.3(6) . . ?
N1B C2B H2B1 109.5 . . ?
N1B C2B H2B2 109.4 . . ?
H2B1 C2B H2B2 109.5 . . ?
N1B C2B H2B3 109.5 . . ?
H2B1 C2B H2B3 109.5 . . ?
H2B2 C2B H2B3 109.5 . . ?
N1B C3B H3B1 109.5 . . ?
N1B C3B H3B2 109.5 . . ?
H3B1 C3B H3B2 109.5 . . ?
N1B C3B H3B3 109.5 . . ?
H3B1 C3B H3B3 109.5 . . ?
H3B2 C3B H3B3 109.5 . . ?
C1C O1C Ni1 116.8(3) . . ?
O1C C1C N1C 124.5(5) . . ?
O1C C1C H1C1 106.2 . . ?
N1C C1C H1C1 106.2 . . ?
O1C C1C H1C2 106.2 . . ?
N1C C1C H1C2 106.2 . . ?
H1C1 C1C H1C2 106.4 . . ?
C1C N1C C3C 120.9(5) . . ?
C1C N1C C2C 120.9(5) . . ?
C3C N1C C2C 117.8(5) . . ?
N1C C2C H2C1 109.5 . . ?
N1C C2C H2C2 109.5 . . ?
H2C1 C2C H2C2 109.5 . . ?
N1C C2C H2C3 109.5 . . ?
H2C1 C2C H2C3 109.5 . . ?
H2C2 C2C H2C3 109.5 . . ?
N1C C3C H3C1 109.5 . . ?
N1C C3C H3C2 109.5 . . ?
H3C1 C3C H3C2 109.5 . . ?
N1C C3C H3C3 109.5 . . ?
H3C1 C3C H3C3 109.5 . . ?
H3C2 C3C H3C3 109.5 . . ?
C1D O1D Ni1 125.3(3) . . ?
O1D C1D N1D 124.3(4) . . ?
O1D C1D H1D1 106.2 . . ?
N1D C1D H1D1 106.2 . . ?
O1D C1D H1D2 106.3 . . ?
N1D C1D H1D2 106.3 . . ?
H1D1 C1D H1D2 106.4 . . ?
C1D N1D C3D 122.4(4) . . ?
C1D N1D C2D 119.9(4) . . ?
C3D N1D C2D 117.7(4) . . ?
N1D C2D H2D1 109.5 . . ?
N1D C2D H2D2 109.5 . . ?
H2D1 C2D H2D2 109.5 . . ?
N1D C2D H2D3 109.5 . . ?
H2D1 C2D H2D3 109.5 . . ?
H2D2 C2D H2D3 109.5 . . ?
N1D C3D H3D1 109.5 . . ?
N1D C3D H3D2 109.5 . . ?
H3D1 C3D H3D2 109.5 . . ?
N1D C3D H3D3 109.5 . . ?
H3D1 C3D H3D3 109.5 . . ?
H3D2 C3D H3D3 109.5 . . ?
O3E S1E O1E 113.2(3) . . ?
O3E S1E O2E 114.4(3) . . ?
O1E S1E O2E 116.4(3) . . ?
O3E S1E C1E 105.3(3) . . ?
O1E S1E C1E 103.7(3) . . ?
O2E S1E C1E 101.7(2) . . ?
F1E C1E F2E 107.0(5) . . ?
F1E C1E F3E 106.3(5) . . ?
F2E C1E F3E 105.5(5) . . ?
F1E C1E S1E 112.6(4) . . ?
F2E C1E S1E 112.1(4) . . ?
F3E C1E S1E 112.7(4) . . ?
O1F C1F N1F 119.8(15) . . ?
O1F C1F H1F1 107.4 . . ?
N1F C1F H1F1 107.3 . . ?
O1F C1F H1F2 107.4 . . ?
N1F C1F H1F2 107.4 . . ?
H1F1 C1F H1F2 106.9 . . ?
C1F N1F C3F 116.5(13) . . ?
C1F N1F C2F 123.4(12) . . ?
C3F N1F C2F 118.5(14) . . ?
N1F C2F H2F1 109.2 . . ?
N1F C2F H2F2 108.8 . . ?
H2F1 C2F H2F2 109.5 . . ?
N1F C2F H2F3 110.4 . . ?
H2F1 C2F H2F3 109.5 . . ?
H2F2 C2F H2F3 109.5 . . ?
N1F C3F H3F1 109.8 . . ?
N1F C3F H3F2 109.3 . . ?
H3F1 C3F H3F2 109.5 . . ?
N1F C3F H3F3 109.3 . . ?
H3F1 C3F H3F3 109.5 . . ?
H3F2 C3F H3F3 109.5 . . ?
C1F' O1F' H1F' 116.2 . . ?
O1F' C1F' N1F' 159(4) . . ?
O1F' C1F' H1F3 93.8 . . ?
N1F' C1F' H1F3 95.4 . . ?
O1F' C1F' H1F4 98.4 . . ?
N1F' C1F' H1F4 97.9 . . ?
H1F3 C1F' H1F4 103.3 . . ?
C1F' N1F' C3F' 113(2) . . ?
C1F' N1F' C2F' 130(2) . . ?
C3F' N1F' C2F' 106.3(18) . . ?
N1F' C2F' H2F4 109.7 . . ?
N1F' C2F' H2F5 109.6 . . ?
H2F4 C2F' H2F5 109.5 . . ?
N1F' C2F' H2F6 109.1 . . ?
H2F4 C2F' H2F6 109.5 . . ?
H2F5 C2F' H2F6 109.5 . . ?
N1F' C3F' H3F4 108.8 . . ?
N1F' C3F' H3F5 109.3 . . ?
H3F4 C3F' H3F5 109.5 . . ?
N1F' C3F' H3F6 110.3 . . ?
H3F4 C3F' H3F6 109.5 . . ?
H3F5 C3F' H3F6 109.5 . . ?

loop_
_geom_torsion_atom_site_label_1
_geom_torsion_atom_site_label_2
_geom_torsion_atom_site_label_3
_geom_torsion_atom_site_label_4
_geom_torsion
_geom_torsion_site_symmetry_1
_geom_torsion_site_symmetry_2
_geom_torsion_site_symmetry_3
_geom_torsion_site_symmetry_4
_geom_torsion_publ_flag
C16 Fe1 N1 C2 -34.7(4) . . . . ?
C17 Fe1 N1 C2 52.2(4) . . . . ?
C18 Fe1 N1 C2 -22(3) . . . . ?
N3 Fe1 N1 C2 -129.2(4) . . . . ?
N5 Fe1 N1 C2 141.3(4) . . . . ?
C16 Fe1 N1 N2 137.6(3) . . . . ?
C17 Fe1 N1 N2 -135.5(3) . . . . ?
C18 Fe1 N1 N2 150(3) . . . . ?
N3 Fe1 N1 N2 43.1(3) . . . . ?
N5 Fe1 N1 N2 -46.4(3) . . . . ?
C2 N1 N2 C4 1.1(5) . . . . ?
Fe1 N1 N2 C4 -173.3(3) . . . . ?
C2 N1 N2 B1 178.8(4) . . . . ?
Fe1 N1 N2 B1 4.3(5) . . . . ?
N6 B1 N2 C4 -127.1(5) . . . . ?
N4 B1 N2 C4 116.6(5) . . . . ?
N6 B1 N2 N1 55.9(5) . . . . ?
N4 B1 N2 N1 -60.4(5) . . . . ?
N2 N1 C2 C3 -0.4(5) . . . . ?
Fe1 N1 C2 C3 172.5(3) . . . . ?
N2 N1 C2 C1 -178.0(4) . . . . ?
Fe1 N1 C2 C1 -5.2(7) . . . . ?
N1 C2 C3 C4 -0.5(5) . . . . ?
C1 C2 C3 C4 177.0(4) . . . . ?
N1 N2 C4 C3 -1.5(5) . . . . ?
B1 N2 C4 C3 -178.7(4) . . . . ?
N1 N2 C4 C5 179.0(4) . . . . ?
B1 N2 C4 C5 1.8(7) . . . . ?
C2 C3 C4 N2 1.2(5) . . . . ?
C2 C3 C4 C5 -179.3(5) . . . . ?
C16 Fe1 N3 C7 44.0(5) . . . . ?
C17 Fe1 N3 C7 -106(6) . . . . ?
C18 Fe1 N3 C7 -41.5(5) . . . . ?
N1 Fe1 N3 C7 135.6(4) . . . . ?
N5 Fe1 N3 C7 -134.4(4) . . . . ?
C16 Fe1 N3 N4 -141.2(3) . . . . ?
C17 Fe1 N3 N4 69(6) . . . . ?
C18 Fe1 N3 N4 133.3(3) . . . . ?
N1 Fe1 N3 N4 -49.6(3) . . . . ?
N5 Fe1 N3 N4 40.4(3) . . . . ?
C7 N3 N4 C9 1.9(5) . . . . ?
Fe1 N3 N4 C9 -174.3(3) . . . . ?
C7 N3 N4 B1 -176.1(4) . . . . ?
Fe1 N3 N4 B1 7.7(5) . . . . ?
N2 B1 N4 C9 -124.4(5) . . . . ?
N6 B1 N4 C9 118.2(5) . . . . ?
N2 B1 N4 N3 53.2(5) . . . . ?
N6 B1 N4 N3 -64.2(5) . . . . ?
N4 N3 C7 C8 -1.4(5) . . . . ?
Fe1 N3 C7 C8 173.8(3) . . . . ?
N4 N3 C7 C6 179.8(4) . . . . ?
Fe1 N3 C7 C6 -5.0(7) . . . . ?
N3 C7 C8 C9 0.4(6) . . . . ?
C6 C7 C8 C9 179.1(5) . . . . ?
N3 N4 C9 C8 -1.7(5) . . . . ?
B1 N4 C9 C8 176.0(5) . . . . ?
N3 N4 C9 C10 176.1(4) . . . . ?
B1 N4 C9 C10 -6.2(8) . . . . ?
C7 C8 C9 N4 0.8(6) . . . . ?
C7 C8 C9 C10 -176.8(5) . . . . ?
C16 Fe1 N5 C12 -25(2) . . . . ?
C17 Fe1 N5 C12 -45.8(4) . . . . ?
C18 Fe1 N5 C12 41.8(4) . . . . ?
N3 Fe1 N5 C12 133.4(4) . . . . ?
N1 Fe1 N5 C12 -137.3(4) . . . . ?
C16 Fe1 N5 N6 154(2) . . . . ?
C17 Fe1 N5 N6 133.3(3) . . . . ?
C18 Fe1 N5 N6 -139.0(3) . . . . ?
N3 Fe1 N5 N6 -47.4(3) . . . . ?
N1 Fe1 N5 N6 41.9(3) . . . . ?
C12 N5 N6 C14 0.0(4) . . . . ?
Fe1 N5 N6 C14 -179.4(3) . . . . ?
C12 N5 N6 B1 -175.9(4) . . . . ?
Fe1 N5 N6 B1 4.7(4) . . . . ?
N2 B1 N6 C14 124.1(5) . . . . ?
N4 B1 N6 C14 -118.9(5) . . . . ?
N2 B1 N6 N5 -61.0(5) . . . . ?
N4 B1 N6 N5 56.0(5) . . . . ?
N6 N5 C12 C13 -0.1(5) . . . . ?
Fe1 N5 C12 C13 179.2(3) . . . . ?
N6 N5 C12 C11 179.1(4) . . . . ?
Fe1 N5 C12 C11 -1.6(7) . . . . ?
N5 C12 C13 C14 0.1(5) . . . . ?
C11 C12 C13 C14 -179.1(4) . . . . ?
N5 N6 C14 C13 0.0(5) . . . . ?
B1 N6 C14 C13 175.2(4) . . . . ?
N5 N6 C14 C15 -179.3(4) . . . . ?
B1 N6 C14 C15 -4.2(7) . . . . ?
C12 C13 C14 N6 -0.1(5) . . . . ?
C12 C13 C14 C15 179.2(4) . . . . ?
C17 Fe1 C16 N7 12(8) . . . . ?
C18 Fe1 C16 N7 -76(8) . . . . ?
N3 Fe1 C16 N7 -167(8) . . . . ?
N1 Fe1 C16 N7 103(8) . . . . ?
N5 Fe1 C16 N7 -9(10) . . . . ?
Fe1 C16 N7 Ni1 -29(13) . . . 3_556 ?
C16 Fe1 C17 N8 -159(15) . . . . ?
C18 Fe1 C17 N8 -74(15) . . . . ?
N3 Fe1 C17 N8 -9(19) . . . . ?
N1 Fe1 C17 N8 109(15) . . . . ?
N5 Fe1 C17 N8 19(15) . . . . ?
C16 Fe1 C18 N9 63(30) . . . . ?
C17 Fe1 C18 N9 -24(30) . . . . ?
N3 Fe1 C18 N9 158(30) . . . . ?
N1 Fe1 C18 N9 50(31) . . . . ?
N5 Fe1 C18 N9 -113(30) . . . . ?
Fe1 C18 N9 Ni1 83(32) . . . . ?
C18 N9 Ni1 N7 -141(7) . . . 3_556 ?
C18 N9 Ni1 O1D -50(7) . . . . ?
C18 N9 Ni1 O1B 40(7) . . . . ?
C18 N9 Ni1 O1A 127(7) . . . . ?
C18 N9 Ni1 O1C 57(8) . . . . ?
N9 Ni1 O1A C1A 84.6(4) . . . . ?
N7 Ni1 O1A C1A -7.8(4) 3_556 . . . ?
O1D Ni1 O1A C1A -122.4(10) . . . . ?
O1B Ni1 O1A C1A 172.0(4) . . . . ?
O1C Ni1 O1A C1A -99.1(4) . . . . ?
Ni1 O1A C1A N1A 159.7(3) . . . . ?
O1A C1A N1A C2A -178.4(4) . . . . ?
O1A C1A N1A C3A -3.4(7) . . . . ?
N9 Ni1 O1B C1B -125.1(4) . . . . ?
N7 Ni1 O1B C1B 153(8) 3_556 . . . ?
O1D Ni1 O1B C1B -31.5(4) . . . . ?
O1A Ni1 O1B C1B 142.3(4) . . . . ?
O1C Ni1 O1B C1B 56.0(4) . . . . ?
Ni1 O1B C1B N1B 169.4(4) . . . . ?
O1B C1B N1B C2B -7.9(10) . . . . ?
O1B C1B N1B C3B 172.1(7) . . . . ?
N9 Ni1 O1C C1C 41(2) . . . . ?
N7 Ni1 O1C C1C -122.0(4) 3_556 . . . ?
O1D Ni1 O1C C1C 147.4(4) . . . . ?
O1B Ni1 O1C C1C 57.0(4) . . . . ?
O1A Ni1 O1C C1C -29.9(4) . . . . ?
Ni1 O1C C1C N1C 165.1(5) . . . . ?
O1C C1C N1C C3C 7.2(9) . . . . ?
O1C C1C N1C C2C -179.4(6) . . . . ?
N9 Ni1 O1D C1D -20.1(4) . . . . ?
N7 Ni1 O1D C1D 72.3(4) 3_556 . . . ?
O1B Ni1 O1D C1D -107.6(4) . . . . ?
O1A Ni1 O1D C1D -173.1(10) . . . . ?
O1C Ni1 O1D C1D 163.6(4) . . . . ?
Ni1 O1D C1D N1D -167.4(3) . . . . ?
O1D C1D N1D C3D -177.3(4) . . . . ?
O1D C1D N1D C2D 3.0(7) . . . . ?
O3E S1E C1E F1E -60.0(5) . . . . ?
O1E S1E C1E F1E -179.2(4) . . . . ?
O2E S1E C1E F1E 59.6(5) . . . . ?
O3E S1E C1E F2E 60.8(5) . . . . ?
O1E S1E C1E F2E -58.4(5) . . . . ?
O2E S1E C1E F2E -179.6(5) . . . . ?
O3E S1E C1E F3E 179.7(4) . . . . ?
O1E S1E C1E F3E 60.5(5) . . . . ?
O2E S1E C1E F3E -60.7(5) . . . . ?
O1F C1F N1F C3F 171.4(19) . . . . ?
O1F C1F N1F C2F 6(4) . . . . ?
O1F' C1F' N1F' C3F' -77(9) . . . . ?
O1F' C1F' N1F' C2F' 145(7) . . . . ?

_diffrn_measured_fraction_theta_max 1.000
_diffrn_reflns_theta_full        25.00
_diffrn_measured_fraction_theta_full 1.000
_refine_diff_density_max         1.342
_refine_diff_density_min         -0.750
_refine_diff_density_rms         0.108

#======END
